1 **Title: Multi-modal mass spectrometry imaging reveals single-cell metabolic states in mammalian**  
2 **liver**

3  
4  
5 Authors:

6 Hua Tian<sup>1,\*,#</sup>, Presha Rajbhandari<sup>2,#</sup>, Jay Tarolli<sup>3</sup>, Aubrianna M. Decker<sup>2</sup>, Taruna V. Neelakantan<sup>4</sup>, Tina  
7 Angerer<sup>5,6</sup>, Fereshteh Zandkarimi<sup>4</sup>, Jacob Daniels<sup>2</sup>, Helen Remotti<sup>7</sup>, Gilles Frache<sup>5</sup>, Nicholas Winograd<sup>1</sup>,  
8 Brent R. Stockwell<sup>2,4,\*</sup>

9  
10 1. Department of Chemistry, Pennsylvania State University, University Park, PA 16802, US

11 2. Department of Biological Sciences, Columbia University, New York, NY 10023, US

12 3. Ionpath Inc., Menlo Park, CA 94025, US

13 4. Department of Chemistry, Columbia University, New York, NY 10027, US

14 5. The Luxembourg Institute of Science and Technology, L-4362 Esch-sur-Alzette, Luxembourg

15 6. Department of Pharmaceutical Biosciences, Uppsala University, SE-751 05 Uppsala, Sweden

16 7. Department of Pathology, Columbia University, New York, NY 10032, US

17

18

19

20

21

22

23

24

25

26

27

28

29

30

31

\* Corresponding authors: Hua Tian: [hut3@psu.edu](mailto:hut3@psu.edu); Brent R. Stockwell: [bstockwell@columbia.edu](mailto:bstockwell@columbia.edu)

# These authors contributed equally to this work

Lead contact for resource requirement: [hut3@psu.edu](mailto:hut3@psu.edu)

32 **Summary**

33 We have developed a powerful workflow to imaging endogenous metabolism in single cells on frozen  
34 tissue, allowing us to discover new cell subtypes in human liver. Performing spatially integrated multi-  
35 omics in single cells within tissues is at the leading frontier in biology but has been prevented by  
36 technological challenges. We developed a critical new technology, cryogenic water cluster ion beam  
37 secondary ion mass spectrometry imaging ( $(\text{H}_2\text{O})_{n>28\text{K}}\text{-GCIB-SIMS}$ ) at 1  $\mu\text{m}$  single-cell resolution. This  
38 allowed us to perform multi-modal mass spectrometry imaging (MSI) to detect metabolites, lipids, and  
39 proteins in single cells within functional liver zones and diverse cell types in the native tissue state. Our  
40 workflow utilizes the desorption electrospray ionization (DESI) mass spectrometry imaging (MSI) to  
41 build a reference map of metabolic heterogeneity and zonation across liver functional units. Then  
42 cryogenic  $(\text{H}_2\text{O})_{n>28\text{K}}\text{-GCIB-SIMS}$  and  $\text{C}_{60}\text{-SIMS}$  integrated metabolomics, lipidomic and proteomics, -  
43 characterizing the metabolic state in single cells on the same tissue section. We found for the first time  
44 that lipids and metabolites can classify liver metabolic zones and liver cell types beyond histological and  
45 protein-marker annotation. This provides a multi-modal workflow to define single-cell states in normal  
46 physiology and disease in mammalian tissue.

47

48 **Key words:** Single-cell spatial omics; Mass spectrometry imaging (MSI); Water cluster ion beam  
49 secondary ion mass spectrometry imaging ( $(\text{H}_2\text{O})_{n>28\text{K}}\text{-GCIB-SIMS}$ ); Desorption electrospray ionization  
50 (DESI); Metabolic states; Liver tissue; Molecular and cellular heterogeneity

51

52

53

54

55

56

57

58

59

60

61

62

## 63 **Introduction**

64 Recent developments in spatial omics technologies have improved how cellular heterogeneity and tissue  
65 organization can be assessed. Efforts such as Human Biomolecular Atlas Program (HuBMAP) (Hu, 2019),  
66 Human Tumor Atlas Network (HTAN) (Rozenblatt-Rosen et al., 2020) and Kidney Precision Medicine  
67 Project (KPMP(El-Achkar et al., 2021)) aim to map the diversity of cell types and subtypes and their  
68 biomarkers to characterize cell types within anatomical structures in healthy and disease tissues at single  
69 cell resolution (Borner et al., 2021). While spatial transcriptomics and proteomics have been the most  
70 common technologies implemented for such efforts, spatial metabolomics could illuminate the crucial role  
71 of effector metabolites that reflect the network of upstream molecules at genomic, transcriptomic and  
72 proteomic levels, but have been difficult to detect (Eberlin, 2014; Hickey et al., 2022; Radtke et al., 2020).  
73 Mass spectrometry imaging (MSI) is the primary method for spatial metabolomics, enabling multiplexed  
74 mapping of untargeted and targeted molecular networks within cells and tissue. Widely used MSI  
75 technologies include desorption electrospray ionization (DESI) (Takats et al., 2005) and matrix-assisted  
76 laser desorption ionization (MALDI) (Caprioli et al., 1997; Winograd, 2018). DESI is an ambient  
77 ionization technique with preferential ionization and characterization of metabolites and lipids at spatial  
78 resolution as high as 30  $\mu\text{m}$  (Eberlin, 2014). MALDI is utilized for lipids, abundant proteins, and  
79 metabolites with a suitable matrix at an achievable spatial resolution of 5-10  $\mu\text{m}$  (Djambazova et al.,  
80 2020).

81  
82 However, the practical application of MSI at a single-cell resolution has not been possible. First, detection  
83 limits hinder imaging of low concentration biomolecules as the amount of material sampled is decreased  
84 exponentially within smaller pixels. Second and critically, cryogenic analysis of native cell states is not  
85 widely applicable to different MSI tools, which is essential to preserve the pristine chemical gradients in  
86 tissue, especially for dynamic and transient metabolites. Finally, due to the incompatibility of sample  
87 preparation and difficulty in preserving dynamic metabolic gradients (Tian et al., 2021), it is challenging  
88 to acquire multi-omic data within the same tissue section, or to spatially co-localize molecules at single  
89 cell level.

90  
91 We have solved these long-standing problems by developing a buncher-time-of-flight (ToF) SIMS  
92 coupled with high voltage water cluster ion beam,  $(\text{H}_2\text{O})_{n(n>28\text{K})}$ -GCIB and establishing a dual-SIMS  
93 workflow. The first step takes advantage of intact biomolecular imaging (up to  $m/z$  5000) at an achievable

94 spatial resolution of ~1  $\mu\text{m}$ , using a newly designed GCIB operating at ~70 kV (Sheraz et al., 2019; Tian  
95 et al., 2021; Tian et al., 2019). Along with cryogenic sample handling, frozen-hydrated biosamples are  
96 transferred in a contamination-free nitrogen atmosphere and images at near-nature status (at 100 K). Cell-  
97 type-specific and tissue structure proteins are mapped in the same sample stained with a panel of  
98 lanthanides-conjugated antibodies using  $\text{C}_{60}$ -SIMS at the spatial resolution of 1  $\mu\text{m}$ . This development  
99 allowed us for the first time to simultaneously map multiple metabolites, lipids, and peptides in the same  
100 tissue section at single-cell resolution, with high sensitivity (Taylor et al., 2021).

101

102 We applied our pipeline to liver tissue, which is a metabolic hub performing diverse and critical functions,  
103 including uptake and storage of nutrients, metabolism, bile secretion, detoxification, protein synthesis,  
104 and immune functions (Trefts et al., 2017). To perform these functions, the hepatic parenchyma exhibits  
105 metabolic zonation based on the gradient of oxygen-and-nutrient-rich blood along the portal triad (PT) to  
106 central vein (CV) axis. The periportal (PP) region surrounding the PT receives a maximum amount of  
107 nutrients and oxygen, and is a key site for oxidative metabolism, including  $\beta$ -oxidation, gluconeogenesis,  
108 bile formation, and cholesterol synthesis. The pericentral (PC) region surrounding the CV receives less  
109 oxygen and nutrients, and is a key site for detoxification, ketogenesis, lipogenesis, glycolysis, glycogen  
110 synthesis and glutamine synthesis (Gebhardt and Matz-Soja, 2014; Kietzmann, 2017).

111

112 Although histologically hepatocytes in different zones appear homogeneous using conventional imaging  
113 methods, these regions are metabolically distinct, shown by the zonal preferences of metabolic enzymes  
114 involved in oxidative energy, carbohydrate, lipid, and nitrogen metabolism, including  
115 carbamoylphosphate synthetase (CPS1), glutamine synthetase (GS) and cytochrome P450, family 2,  
116 subfamily AE, polypeptide1 (Cyp2ae1) (Lamers et al., 1989). The heterogeneity of the liver extends to  
117 the cellular level, where multiple cell types are organized in a structured manner to carry out essential  
118 liver functions. Within the liver parenchyma, hepatocytes make up 70% of the cell population and are  
119 metabolically heterogeneous along the porto-central axis. Non-parenchymal cells, including macrophages  
120 (Kupffer cells), liver sinusoidal endothelial cells, and hepatic stellate cells, are located within the hepatic  
121 sinusoids and play a critical role in interacting with and regulating parenchymal cells (Aizarani et al.,  
122 2019). While liver zonation and function has mainly been explored with immunohistochemistry and single  
123 cell spatial transcriptomics (Gebhardt and Matz-Soja, 2014; Halpern et al., 2017), measurement of lipids  
124 and metabolites, the effector molecules of metabolic pathways, is lacking.

125

126 Here, we present a multimodal MSI approach centered on DESI,  $(\text{H}_2\text{O})_n\text{-GCIB-SIMS}$  and  $\text{C}_{60}\text{-SIMS}$  for  
127 mapping of untargeted, endogenous, unlabeled metabolites and lipids, and targeted protein markers within  
128 anatomical structure and cell types, providing a powerful new understanding of metabolic zonation and  
129 cell type identity in mouse and human liver. This workflow is complemented and validated by histologic  
130 (hematoxylin and eosin (H&E)) staining for anatomical structure annotation within liver and multimodal  
131 image alignment, RNAScope for mRNA transcript profiling of landmark genes (Wang et al., 2012) for  
132 zonation marking and antibody validation, and MALDI Orbitrap MSI. Moreover, ultra-high performance  
133 liquid chromatography (UPLC) coupled with electrospray ionization (ESI) tandem mass spectrometry  
134 (MS/MS) is adapted for lipid confirmation in DESI and SIMS experiments. Heterogeneities in liver tissue  
135 were detected by the combination of metabolites, lipids, and proteins in human and mouse liver, including  
136 sex-specific zonation patterns, functional-specific zonation, and metabolic states of different cell types.  
137 We found for the first time that lipid and metabolite composition classify liver zonation and cell types, as  
138 well as novel cell subtypes that have not previously been detected by protein or RNA markers. Thus, this  
139 new technology for single-cell multi-omic imaging allows for unprecedented understanding metabolic cell  
140 states and cell identity.

141

## 142 **Results and discussion**

### 143 *Multimodal imaging centered on novel mass spectrometry imaging technologies reveals a spatial multi-* 144 *omic (metabolite, lipid and protein) atlas of liver tissue*

145 To comprehensively assess the spatial organization of liver tissue with regard to its cellular and metabolic  
146 and lipidomic heterogeneity, we performed multi-modal imaging on consecutive tissue sections of mouse  
147 and human liver using DESI, H&E staining, SIMS, and RNAscope, followed by computational data  
148 processing for cellular and structure segmentation, omics integration and discriminant analysis.  
149 Histological features of the H&E tissue sections were analyzed to guide MSI, with a focus on the PT and  
150 CV regions.

151

152 DESI was employed to image an entire tissue section at a spatial resolution of 40  $\mu\text{m}$  in both positive and  
153 negative ion modes. More than 100 lipid and metabolite features were extracted, and ion species localized  
154 to the PP and PC regions (Figure 1a) were identified. A region containing both PT and CV was selected  
155 on consecutive tissue sections for single-cell resolution SIMS imaging in a frozen-hydrated state (Figure

156 1B). We implemented a novel technological development using a three-step process: first, cryogenic  
157  $(\text{H}_2\text{O})_n$ -GCIB-SIMS was performed to localize >100 lipid and metabolites in a pristine native environment  
158 at 3  $\mu\text{m}$  per pixel, followed by staining with a panel of lanthanide-labeled antibodies specific to liver  
159 biology (Table S1 and S2) on the same tissue section.  $\text{C}_{60}$ -SIMS was then utilized to image metal-labeled  
160 antibodies to map cell-types, cell states, and structure-specific protein markers at 1  $\mu\text{m}$  per pixel. As  
161  $(\text{H}_2\text{O})_n$ -GCIB-SIMS removes about 100 nm material from the tissue surface, the antibody markers stain  
162 the same cells as those from which lipids and metabolites are detected. This unique approach facilitated  
163 image alignment and cell segmentation to register untargeted metabolites and lipids and targeted proteins  
164 to single cells on the same tissue section, elucidating biomolecular complexity within different cell types  
165 directly in their tissue content without dissociation, which is otherwise not possible in single-cell  
166 multimodal image integration.

167

168 To validate DESI and SIMS imaging in terms of assignment of zones and cell types, RNAScope was  
169 performed on a consecutive tissue section for transcriptomic analysis of several zonation and cell-type-  
170 specific markers. To validate ion species assignment by accurate mass and fragmentation pattern, we  
171 performed (a) MALDI on an Orbitrap, performed on the serial sections for in situ MS/MS analysis, and  
172 (b) lipidomics analysis using UPLC with ion mobility time-of-flight  $\text{MS}^E$  ( $\text{HDMS}^E$ ) data-independent  
173 acquisition and analysis (Figure 1C).

174

175 With 2D/3D image reconstruction, molecular and cellular heterogeneity was visualized (Figure 1E),  
176 showing distinct molecular clusters in different areas and Correlation of proteins and metabolites and  
177 lipids in the PT region in human liver.

178

### 179 ***DESI MSI reveals metabolic zonation-specific metabolites and lipids in mouse liver***

180 To evaluate metabolite and lipid distribution with metabolic zones, we first examined histology of mouse  
181 liver tissue sections obtained from six different mice (3 male and 3 female). H&E-stained images were  
182 annotated to identify the PT and CV regions, showing uniform distribution patterns within the tissue  
183 (Figure 2 Ai, S1a). The annotation was then validated by transcript and protein markers targeting  
184 metabolic enzymes that are specific to PP and PC regions(Lamers et al., 1989). For example, Albumin  
185 (*Alb*) was concentrated in the PP region, and Glutamine Synthetase (*Glul*) was localized in the PC region  
186 using RNAScope, respectively (Figure 2 Aii, S1b). The distributions were consistent with the previous

187 work(Halpern et al., 2017), however, we noted sex-linked differences. *Alb* was concentrated more around  
188 the PP zone in male mice, whereas it expanded towards the central vein in female mice. *Glul* expression  
189 has been previously shown to exhibit sex-specific variation in different mouse and rat strain(Sirma et al.,  
190 1996); we observed a similar distribution pattern between male and female mice in the C57BL6 mouse  
191 strain used in this study.

192

193 DESI imaging of mouse liver showed distinct mass spectra representing metabolites and lipids in both  
194 positive and negative ion mode. In positive mode, ions corresponding to lipids from different classes,  
195 including glycerophospholipids and glycerolipids were observed (Figure S2a, Table S3). In negative ion  
196 mode, free fatty acids and small metabolites in a low  $m/z$  range ( $m/z$  100-400), glycerophospholipids in  
197 high  $m/z$  range ( $m/z$  700-800) and conjugated bile acids were observed (Figure S2b, Table S3). In order  
198 to extract PP and PC specific lipids and metabolites, we first sought to create a segmentation mask for  
199 these regions within tissue sections. A few ion species ( $m/z$  124.01, 280.23, 282.25, 306.07 and 309.28)  
200 in negative ionization mode and  $m/z$  534.29, 631.47, 734.57, 794.51, 802.5 and 852.55 in positive  
201 ionization mode) exhibiting unique distribution patterns were used to perform bisecting k-means  
202 clustering with Euclidean distance, within the SCiLS software platform. Spatial segmentation was  
203 performed with edge-preserving denoising to remove pixel-to-pixel variability observed in MSI  
204 datasets(Alexandrov et al., 2010). This resulted in PP and PC clusters in individual mouse liver tissue  
205 sections in both positive and negative ion mode, shown as a segmentation map (Figure 2 Aiii and Av, S1c  
206 and S1d).

207

208 We confirmed cluster specificity by comparing *Alb* and *Glul* transcript distribution with DESI  
209 segmentation (Figure S1b, S1c and S1d). To identify lipids and metabolites that discriminate PC versus  
210 PP clusters, we implemented a binary classifier—receiver operating characteristic (ROC)-area under the  
211 curve (AUC) curve analysis(Bradley, 1997; Mandrekar, 2010). Each tissue-specific ion was evaluated for  
212 its discriminating power, using a threshold of the area under the curve (AUC)  $>0.70$  to be considered a  
213 classifier. We observed that metabolites such as glutathione (GSH), taurine, and conjugated bile acids  
214 were zoned in PP region (Figure 2B, S3c, S3d). Our results were complementary to previous results on  
215 the metabolic gradients from PC to PP. Liver bile acids are primarily synthesized in PC hepatocytes, they  
216 flow towards the bile duct and the enzymes cascade involved in bile acid biosynthesis is organized

217 spatially. In particular, the enzyme conjugating bile acids is abundant in PP region, where taurine also  
218 comes in from blood supply (Halpern et al., 2017; Ikeda et al., 2012).

219

220 As noted, we observed sexual dimorphism in the distribution of several lipid species. While previous  
221 studies have shown sex-specific differences in lipid metabolism, it has not been shown in the spatial  
222 context within liver (Mittendorfer, 2005; Soares et al., 2017). Diacylglycerols (DGs) and free fatty acids  
223 (FAs) are zoned in the PC region (Figure 2B, S3a, S3b), with the average ROC-AUC for individual DG  
224 ions for males of  $>0.89$  and females  $>0.7$  (Figure 2B). Compared to females, male mice showed higher  
225 amounts of DGs in PC versus PP zones ( $\log_2$  fold change of  $\sim 1.5$  for males and  $0.4$  for females) (Figure  
226 2C). Similar observations were made for FAs (Figure 2B, 2C, S3b). While some FAs such as FA(18:1),  
227 FA(20:1), FA(18:3;O), FA(18:2) and FA(20:0) show high specificity for PC versus PP zone, with the  
228 average ROC-AUC for individual ions for males of  $>0.88$  and females  $>0.7$  (Fig 2B), others such as  
229 FA(18:2;O), FA(16:0), FA(22:5) and FA(20:2) exhibited higher specificity for PC zones in males versus  
230 females, with the average ROC-AUC for individual ions for males of  $>0.73$  and females  $<0.57$ . FA (20:0)  
231 and FA(18:3;O) showed relatively higher abundance in PC versus PP in both male and female mice, and  
232 FA(20:1) and FA(22:5) showed minimal differences between the regions in female mice (Figure 2C, S3b).

233

234 The PC region has previously been reported to exhibit a higher degree of lipogenesis, fatty acid synthesis  
235 and acetyl CoA carboxylase expression than the PP zone (Guzman and Castro, 1989; Quistorff et al.,  
236 1992). On the other hand, phospholipids, including phosphatidylcholine (PCs) and  
237 lysophosphatidylcholine (LPCs), did not exhibit a specific pattern. Some lipids (e.g., PC(40:6)) showed  
238 similar distribution between the PP and PC zones, while others (e.g., PC (36:5), PC (32:0), PC(34:1))  
239 exhibited differential distributions between regions, or between regions and sexes (e.g., LPC(18:2),  
240 LPC(18:0), LPC(16:0), PC(38:4) and PC(39:7)) (Figure 2B, 2C, S3e). Thus, while male and female mice  
241 have histologically and morphologically similar livers, they are metabolically quite distinct.

242

### 243 *DESI MSI reveals zonation-specific metabolites and lipids in human liver*

244 The established DESI workflow was then performed on consecutive tissue sections from human liver  
245 tissue. H&E staining was performed to assess tissue morphology and annotate PP and PC regions (Figure  
246 2D). RNAScope was used to validate *Glul* staining, which unlike in mouse liver, appeared as dispersed



247 puncta around the CV region (Figure S4). This is likely due to lower expression of the gene in human  
248 liver. Hence, PP and PC regions were annotated manually based on H&E staining (Figure 2D).

249

250 DESI imaging at 40  $\mu\text{m}$  spatial resolution showed similar average mass spectra profiles in both positive  
251 and negative ion modes compared to mouse liver (Figure S2c, S2d). Taurine-and-glycine-conjugated bile  
252 acids were abundant in the PT and PP region, as well as in the septa connecting the neighboring PTs,  
253 showing similar functional zonation between human and mouse liver (Figure 2D, S5b). The vasculature  
254 were identified by the abundance of the marker, Heme B. Cholesterol, a precursor to bile acids, was  
255 concentrated within PV and CV (Figure S5e). Sphingomyelins (SMs) including SM 34:1 were colocalized  
256 with cholesterol (Figure 2D, S5e), where SMs are postulated to form hydrophobic lipid raft domains with  
257 cholesterol, preventing hepatic damage from bile salts, and also playing a role in pathophysiology (Amigo  
258 et al., 1999; Simons and Eehalt, 2002). Similarly, stearyl carnitine was localized in the PP region (Figure  
259 2D), where acyl carnitines play an important role in transferring long-chain fatty acids to mitochondria for  
260  $\beta$ -oxidation (Longo et al., 2016). Several small metabolites and different lipid species exhibited differential  
261 distributions in human tissue (Figure 2D, S5). FAs, DAGs and triglycerides (TAGs) exhibited distinct  
262 distribution patterns, which unlike in mouse tissue, did not overlay well with the PC region (Figure 2D,  
263 S5a, S5c, S5d). This could stem from the complexity of human liver, where metabolic gradients are more  
264 dynamic and heterogeneous, based on a person's genetic profile and changes in gene expression and  
265 metabolic-enzymes-based factors such as diet, hormones, gender and underlying pathology (Geisler and  
266 Renquist, 2017; Kietzmann, 2017). Similarly, varied patterns of phospholipid species were observed  
267 within the liver (Figure S5f).

268

269 In addition to 2D imaging of tissue sections, 3D DESI aids the visualization of the distribution of lipids  
270 and metabolites within three-dimensional tissue structures and gradients with respect to tissue depth,  
271 capturing branching of blood flow and anatomic structure. The resulting 3D model visualizing  
272 differentially distributed lipids is shown in Supplementary Video 1.

273

274 *SIMS imaging delineates heterogeneities of multiple biomolecules and cell types at single-cell level in*  
275 *mouse liver*

276 To associate lipids and metabolites with different types of cells in the liver, dual SIMS imaging at the  
277 resolution of 1-3  $\mu\text{m}$  was performed on a consecutive mouse liver sections. Guided by H&E stained

278 images, a region of interest (ROI) containing both CV and PV was selected (Figure 3 Ai) for  $(\text{H}_2\text{O})_{n(n=30k)}$ -  
279 GCIB-SIMS imaging in negative ion mode, mapping more than 100 lipids and metabolites in both mouse  
280 and human liver. The highly heterogenous metabolites and lipids were observed around CV and PV,  
281 including nucleotides, bile acids, glucose, fatty acids (FA), phosphatidylinositols (PIs),  
282 phosphatidylserines (PSs), lysophosphatidylserines (LPSs), phosphatidic acids (PAs), lysophosphatidic  
283 acids (LPAs). PI(38:4) was highly concentrated in the PC region, and PS(40:6) distributed in  
284 complimentary locations with an elevated concentration around the PP region. Heme B was mainly present  
285 inside of the veins, while taurocholic acid was present in the PP region (Figure 3Aii, S6A and S5E). On  
286 the same region, ten cell-type-specific and tissue structure markers illuminated a heterogeneous cell  
287 landscape and recapitulated the anatomical structures in the mouse liver (Figure 3 Aii). The single ion  
288 images of selected species are detailed in Figure S6, exhibiting various distribution patterns.

289

290 Principle component analysis (PCA) revealed clusters of ions contributing to the major features around  
291 the CV and PV (Figure S7). Heme B, a marker for vasculature, was highly concentrated inside the vein in  
292 principal component 2 (PC2). As an exclusive and essential lipid constituent of mitochondrial membranes,  
293 a variety of cardiolipins (CLs) was elevated around the PV rather than the CV, which is in line with the  
294 oxygen gradient captured in PC4 (Paradies et al., 2014). PC5 highlights the CV region with species  
295 PI(38:4), PS(38:4), PA(38:4), LPA(18:0), FA(20:4) and PS(38:3). On the other hand, PC6 shows the  
296 radiated gradient around the PV with dominated species LPS(16:1), and LPS(16:0), echoing an earlier  
297 study on increased PS-PLA1 or LPS receptor 1 (LPS1) mRNA in hepatocellular carcinoma (HCC)  
298 tissues(Uranbileg et al., 2020). The chemical gradients of these species were measured along the porto-  
299 central axis by line scanning (Figure 3B). Glucose appeared more abundant inside the CV and PV, the  
300 same as Heme B. GSH and AMP had similar patterns as glucose, indicating high energy consumption in  
301 the CV and PV region. Most PI species were concentrated around the CV region (e.g., PI(38:4)), while  
302 PA and PS species were found to be higher in the PV region (e.g., PA(40:6), PS(40:6)). PE(40:6) appeared  
303 to be more intense at the edge of the CV and PV, contributing to the curved structure and mechanical  
304 resistance facilitated by the conical shape of PE). Figure S8 demonstrates more species with similar  
305 chemical gradients across the CV and PV.

306

307 Sequential  $\text{C}_{60}$ -SIMS imaging on the same region profiled by  $(\text{H}_2\text{O})_{n(n=30k)}$ -GCIB-SIMS further revealed  
308 the distribution of targeted protein markers using a panel of lanthanide-labeled antibodies. The panel was

309 designed to identify major cell types, immune cells, cell boundaries and zonation markers within liver  
310 (Table S1). Leukocytes, Ito stellate cells, sinusoidal endothelial cells and macrophages/Kupffer cells were  
311 localized with the markers CD45/CD11b red, GFAP in yellow, LYVE-1 in white, CD68 and F4/80 in  
312 magenta, respectively (Figure 3Aii). As expected, GS (in Green) expression was abundant around CV,  
313 which is consistent with RNAScope results (Figure S2b). EGFR and Na/K-ATPase in cyan defined the  
314 cell border, facilitating cell segmentation and image alignment to register multiple lipids and metabolites  
315 in individual cells. The single-channel imaging of each antibody using C<sub>60</sub>-SIMS (Figure S10) was  
316 validated by immunohistochemistry (IHC) (Figure S9).

317

318 Image processing for alignment, registration, and cell segmentation by Deepcell(Keren et al., 2018) are  
319 described in Figure 3 Aiii and detailed in Figure S15-17. With this, the detected omics molecules using  
320 dual- SIMS imaging were registered to individual segmented cells for further statistical analysis. The  
321 hierarchical clustering algorithm (HCA) compares the intensities variation of monitored metabolites/lipids  
322 among different cell types, providing a comprehensive view of cell signatures and metabolic states. As  
323 shown in Figure 3C, GS expressing cells comprise significant PI(38:4), which metabolizes to downstream  
324 signaling molecules phosphatidylinositol phosphate (PIPs) known to bind many proteins and control  
325 protein-protein interactions(Amos et al., 2019). PE(40:6) also contributes to the GS-positive cells,  
326 particularly cells in the inner circle of the CV and PV. Along with PA(38:4), PS(38:4), GD(d40:1),  
327 PI(40:6), PE(38:4), PI(40:4), PE(36:2), FA(20:0), PA(41:6) and PI(36:4), these lipids were more abundant  
328 in Glul-positive cells around the CV. The glucose content was highest among the CD11b positive cells,  
329 suggesting a high glucose-dependant metabolism. Sinusoidal cells labeled by LYVE-1 are rich in lipids  
330 with a low degree of unsaturation. Cells expressing the periportal hepatocyte-specific marker  
331 (Heppar1/CPS1) consist of a higher level of LPAs and cardiolipins.

332

333 Next, t-distributed stochastic neighbor embedding (t-SNE) was performed to cluster the single cell data  
334 points that integrate the omics molecules detected using SIMS, showing metabolites and lipids only can  
335 classify the cell populations. As in Figure 3D, Clusters 1-8 highlight the regions around the PP and PC  
336 regions, particularly cluster 1, identifying the portal endothelial cells that are consistent with the  
337 localization of LYVE-1 positive cells (Figure 3Di, 3Dii). The cells in clusters 2-6 are co-localized with  
338 Heppar-1 positive cells (Figure 3 Dii). Separating the same type of cells into distinct clusters is likely  
339 related to the vastly different metabolic/lipidomic states of hepatocytes at various locations, and reflects

340 the varying functions among the same cell types. Cluster 7-8 are around the CV, the exact location of Glul  
341 expressing cells (Figure 3 Di, 3 Dii). Hence, the abundance of metabolites and lipids allows for clustering  
342 of cells into distinct subpopulations, some of which are not captured by conventional protein markers.

343 *SIMS delineates heterogeneity by cell-type specific multi-omics at single cell level in human liver*

344 The same workflow for dual SIMS imaging was repeated around PT on a human liver tissue section  
345 (Figure 4). The high-resolution images demonstrated the heterogeneous biomolecules, as PS (36:1)  
346 outlined the PT, PI (38:4) was localized outside the PT primarily, and Heme B was inside of the PT  
347 (Figure 4 Aii). The single ion images of 246 metabolites and lipids are in Figure S11, among them, 120  
348 species were annotated.

349

350 PCA analysis distinguished two anatomical features and metabolic flux around the PT (Figure S12). The  
351 PT ring has abundant PS(36:1), PA(36:1) and PI(38:4), with significant higher PS(36:1) that defines the  
352 PT region. Inside the PT ring, Heme B and several PA species are dominant. The metabolic flux also  
353 shows anti-correlated patterns, with taurodeoxycholic acid/taurodeoxycholic, FA (C18:2) and FA (C18:1),  
354 taurocholic acid and PEp(40:6) to the left of the PT ring and GSH to the right.

355

356 On the same tissue, protein markers show the major cell types, immune cells and cell states (Figure 4  
357 Aiii). With the same computational process (Figure 3 Aiii), HCA elucidates the variation of monitored  
358 metabolites/lipids in different cell types and structural regions, namely CD4, CD45, Epcam, LYVE-1,  
359 CD68, SMA and collagen I (Figure 4B). IHC validation and single-channel image of antibody panel  
360 (Table S2) are detailed in Figure S13 and S14, respectively. T-helper cells (CD4) and leukocytes (CD45),  
361 were located mainly around the PT, sharing similar metabolism of high glucose consumption. Epcam, as  
362 an epithelial antigen, shows the highest GSH level that correlates to the activation of antioxidant  
363 mechanism. Sinusoidal cells (LYVE-1) comprise the higher ganglioside GM3 and PE species, which are  
364 highly relevant to cell adherence and mechanical resistance to highly packed cellular region (Calzada et  
365 al., 2016; Labrada et al., 2018). Without distinct lipidomic and metabolic features, macrophage/Kupffer  
366 cells (CD68) seemed to have slightly higher CLs, representing a higher number of mitochondria. As a  
367 major tissue structure marker, SMA is co-localized with PS 36:1 abundant region.

368

369 tSNE clustering was further applied to classify cells using metabolites and lipids (Figure 4 Ci and 4 Cii).  
370 Cluster 1, 4, 5 and 8 were consistent with the GFAP, collagen I, CD45 and SMA positive cells,

371 respectively. Low expression of Arg-1, CD4, Glul and CK19 were also observed in these clusters.  
372 Periportal hepatocytes expressing Arg-1 and Albumin were sub-classified into clusters 2, 3, 6 and 7. The  
373 overlapping of protein markers for each tSNE cluster was likely to be the shared signature metabolites  
374 and lipids among them. Several factors contributed to the success of the cell classification by metabolites  
375 and lipids, the successive high-resolution SIMS images on the same tissue that facilitates the accurate cell  
376 segmentation and image registration, and cryogenic SIMS workflow that preserves the pristine chemistry  
377 in single cells.

378

### 379 ***RNA Scope, MALDI Orbitrap and LC-MS to validate the core MSI workflow***

380 To validate antibody markers used in the study, namely CD68, Glul, Albumin and LYVE1, single-  
381 molecule mRNA fluorescent *in situ* hybridization was performed on human liver tissue section. Color  
382 overlaid images of RNA Scope show the distribution of the RNA copies (Figure S4) consistent with images  
383 of proteins (Figure S9, S10, S13 and S14). For example, protein GS and its corresponding mRNA  
384 transcript, *Glul*, were localized around CV, but not PV. In addition, fluorescent slide scanning allowed  
385 easy identification of PV and CV, compared to H&E staining in mouse liver tissue sample (Figure S1b).

386

387 The identity of the zone-specific lipids was assessed using accurate mass match of the MSI-derived ions  
388 of interest against the library databases (Fahy et al., 2009) followed by UPLC-MS<sup>E</sup> fragment analysis from  
389 lipidomics analysis from liver tissue lipid extracts (Table 1). The analysis of DESI and lipidomics analysis  
390 with lockmass correction helps to align the precursor mass with high accuracy. The UPLC-MS<sup>E</sup> data was  
391 searched for the most commonly formed adducts,  $[M+H]^+$ ,  $[M+Na]^+$ ,  $[M+K]^+$  in positive ion mode for DESI and  
392  $[M-H]^-$  for negative ion mode for both DESI and SIMS. The metabolites were annotated by accurate mass  
393 search against the library database (Smith et al., 2005; Wishart et al., 2022) and accurate mass and ion  
394 mobility drift time of the standard when available. Most of the precursor ion matches between the DESI  
395 and LC-MS were phospholipids and glycerolipids in positive ion mode, and for SIMS were phospholipids  
396 in negative ion mode. Similarly, confirmation of lipid species based on MALDI is shown in Table S3 and  
397 S4. DESI and SIMS identified a complementary list of species around CV and PV (Table 1), resulting  
398 from the difference in preferential ionization for different lipid species. High-resolution SIMS uncovered  
399 several metabolites and lipids that have a thin circulate structure around both central and portal veins, such  
400 as GSH, AMP, PE(40:6), PA(36:1), PS(38:3) and PI(38:4); some species were much more concentrated  
401 inside the veins, such as LPAs (Figure S6 and Figure S11). While DESI confirmed distinct distributions

402 of more free fatty acids, conjugated bile acids and glycerolipids (Figure 2 and Figure S3). All species were  
403 validated by in situ tandem MS using MALDI (Table S3 and S4). However, metabolites and fatty acids  
404 are not validated by MALDI due to the mass interferences for species below  $m/z$  350 from the matrix. The  
405 results demonstrate the complementary approach using a variety of MSI methods for more comprehensive  
406 imaging of biosamples.

407

## 408 **Discussion**

409 This study demonstrates for the first time major technological improvements that enable a multi-modal  
410 workflow for multiplexed imaging of metabolites, lipids and proteins for integrated spatial omics at  
411 anatomical structure and single-cell resolution. The multi-scale biomolecule detection works efficiently  
412 to distinguish anatomical features (*e.g.*, CV, PV and PT) and metabolic zones in liver tissue. Moreover,  
413 significant variations of species are observed in different types of liver cells (*e.g.*, hepatocytes, Kupffer,  
414 sinusoidal cells, macrophages, T cells and leucocytes), demonstrating that different metabolic states are  
415 needed for spatial division of labor to efficiently manage a multitude of metabolic functions. Finally, we  
416 observed sex-specific differences in the distributions of many lipid species, suggesting that male and  
417 female livers may be functionally quite distinct, with implications for understanding sex-specific  
418 differences in disease risk.

419

420 There is growing interest in dissecting cellular and metabolic heterogeneity directly on tissue at single-  
421 cell resolution. Spatial metabolomics is becoming an attractive approach to answer questions about liver  
422 metabolic reprogramming, which is associated with a spectrum of liver diseases. This requires  
423 characterizing cell types and cell neighborhoods, as well as an atlas of biomolecule abundances within the  
424 cell types, taking into account where these cell types exist within the tissue architecture. However, there  
425 are few analytical tools to image multiple types of molecules in single cells directly on tissue without  
426 dissociation. Consecutive SIMS imaging on the same frozen-hydrated tissue offers single-cell resolution  
427 and high chemical sensitivity to integrate spatial multi-omics (untargeted metabolomics and lipidomics  
428 and targeted proteomics) in the same individual cells and at a near-native state of biological tissue. With  
429 well-preserved gradients of small molecules, which would be otherwise diffused by any chemical fixation  
430 and drying process, the metabolic state of different types of cells can be revealed in liver tissue. In addition,  
431 cell population separation on tissue directly by metabolic states has not been reported, but some success

432 has been shown on classification of co-cultured cells by metabolic states using MALDI imaging and  
433 computational approach SpaceM(Rappez et al., 2021).

434

435 With cryogenic multi-modal SIMS imaging at high-resolution and data processing, we show for the first  
436 time that integrated metabolomic and lipidomic profiling in individual cells can be used for cell  
437 classifications without protein markers and tissue dissociation. Additionally, subsets of cell types are  
438 captured by distinct metabolic signatures among cells expressing the same proteins. As the role of  
439 individual lipid species are understudied, this platform could be extended to overlay spatial  
440 transcriptomics and proteomics characterizing the distribution of enzymes involved in lipid metabolism  
441 to fully elucidate the spatial diversity and its functional significance. This will provide a rare opportunity  
442 to investigate previously unknown cellular subtypes and their unique protein-lipid-metabolite interactions.

443

444 A robust pipeline with high-resolution multi-modal MSI and computational processing adds layers of  
445 spatial omics about metabolic and lipidomic heterogeneity in different types of cell populations,  
446 distinguishing subpopulations and distinct metabolic functions within individual cells on normal liver  
447 tissue. This workflow can be readily applied to liver disease models for the discovery of metabolic  
448 vulnerability and associated cell types, heterogenous shift of disease microenvironment, and cell-to-cell  
449 interaction, ultimately leading to new therapeutic opportunities.

450

## 451 **References**

452 Aizarani, N., Saviano, A., Sagar, Mailly, L., Durand, S., Herman, J.S., Pessaux, P., Baumert, T.F., and  
453 Grun, D. (2019). A human liver cell atlas reveals heterogeneity and epithelial progenitors. *Nature* 572,  
454 199-204.

455 Alexandrov, T., Becker, M., Deininger, S.O., Ernst, G., Wehder, L., Grasmair, M., von Eggeling, F.,  
456 Thiele, H., and Maass, P. (2010). Spatial segmentation of imaging mass spectrometry data with edge-  
457 preserving image denoising and clustering. *J Proteome Res* 9, 6535-6546.

458 Amigo, L., Mendoza, H., Zanlungo, S., Miquel, J.F., Rigotti, A., Gonzalez, S., and Nervi, F. (1999).  
459 Enrichment of canalicular membrane with cholesterol and sphingomyelin prevents bile salt-induced  
460 hepatic damage. *J Lipid Res* 40, 533-542.

- 461 Amos, S.-B.T.A., Kalli, A.C., Shi, J., and Sansom, M.S.P. (2019). Membrane Recognition and Binding  
462 by the Phosphatidylinositol Phosphate Kinase PIP5K1A: A Multiscale Simulation Study. *Structure*  
463 (London, England : 1993) 27, 1336-1346.e1332.
- 464 Bannon, D., Moen, E., Schwartz, M., Borba, E., Kudo, T., Greenwald, N., Vijayakumar, V., Chang, B.,  
465 Pao, E., Osterman, E., *et al.* (2021). DeepCell Kiosk: scaling deep learning-enabled cellular image  
466 analysis with Kubernetes. *Nat Methods* 18, 43-45.
- 467 Beare, R., Lowekamp, B., and Yaniv, Z. (2018). Image Segmentation, Registration and Characterization  
468 in R with SimpleITK. *J Stat Softw* 86.
- 469 Borner, K., Teichmann, S.A., Quardokus, E.M., Gee, J.C., Browne, K., Osumi-Sutherland, D., Herr,  
470 B.W., 2nd, Bueckle, A., Paul, H., Haniffa, M., *et al.* (2021). Anatomical structures, cell types and  
471 biomarkers of the Human Reference Atlas. *Nat Cell Biol* 23, 1117-1128.
- 472 Bradley, A.P. (1997). The use of the area under the roc curve in the evaluation of machine learning  
473 algorithms. *Pattern Recogn* 30, 1145-1159.
- 474 Calzada, E., Onguka, O., and Claypool, S.M. (2016). Phosphatidylethanolamine Metabolism in Health  
475 and Disease. *Int Rev Cell Mol Biol* 321, 29-88.
- 476 Caprioli, R.M., Farmer, T.B., and Gile, J. (1997). Molecular imaging of biological samples: localization  
477 of peptides and proteins using MALDI-TOF MS. *Anal Chem* 69, 4751-4760.
- 478 Djambazova, K.V., Klein, D.R., Migas, L.G., Neumann, E.K., Rivera, E.S., Van de Plas, R., Caprioli,  
479 R.M., and Spraggins, J.M. (2020). Resolving the Complexity of Spatial Lipidomics Using MALDI  
480 TIMS Imaging Mass Spectrometry. *Anal Chem* 92, 13290-13297.
- 481 Eberlin, L.S. (2014). DESI-MS imaging of lipids and metabolites from biological samples. *Methods Mol*  
482 *Biol* 1198, 299-311.
- 483 El-Achkar, T.M., Eadon, M.T., Menon, R., Lake, B.B., Sigdel, T.K., Alexandrov, T., Parikh, S., Zhang,  
484 G., Dobi, D., Dunn, K.W., *et al.* (2021). A multimodal and integrated approach to interrogate human  
485 kidney biopsies with rigor and reproducibility: guidelines from the Kidney Precision Medicine Project.  
486 *Physiol Genomics* 53, 1-11.
- 487 Fahy, E., Subramaniam, S., Murphy, R.C., Nishijima, M., Raetz, C.R., Shimizu, T., Spener, F., van  
488 Meer, G., Wakelam, M.J., and Dennis, E.A. (2009). Update of the LIPID MAPS comprehensive  
489 classification system for lipids. *J Lipid Res* 50 *Suppl*, S9-14.
- 490 Gebhardt, R., and Matz-Soja, M. (2014). Liver zonation: Novel aspects of its regulation and its impact  
491 on homeostasis. *World J Gastroenterol* 20, 8491-8504.



- 492 Geisler, C.E., and Renquist, B.J. (2017). Hepatic lipid accumulation: cause and consequence of  
493 dysregulated glucoregulatory hormones. *J Endocrinol* 234, R1-R21.
- 494 Guzman, M., and Castro, J. (1989). Zonation of fatty acid metabolism in rat liver. *Biochem J* 264, 107-  
495 113.
- 496 Halpern, K.B., Shenhav, R., Matcovitch-Natan, O., Toth, B., Lemze, D., Golan, M., Massasa, E.E.,  
497 Baydatch, S., Landen, S., Moor, A.E., *et al.* (2017). Single-cell spatial reconstruction reveals global  
498 division of labour in the mammalian liver. *Nature* 542, 352-356.
- 499 Hickey, J.W., Neumann, E.K., Radtke, A.J., Camarillo, J.M., Beuschel, R.T., Albanese, A.,  
500 McDonough, E., Hatler, J., Wiblin, A.E., Fisher, J., *et al.* (2022). Spatial mapping of protein  
501 composition and tissue organization: a primer for multiplexed antibody-based imaging. *Nat Methods* 19,  
502 284-295.
- 503 Hu, B.C. (2019). The human body at cellular resolution: the NIH Human Biomolecular Atlas Program.  
504 *Nature* 574, 187-192.
- 505 Ikeda, S., Tachikawa, M., Akanuma, S., Fujinawa, J., and Hosoya, K. (2012). Involvement of gamma-  
506 aminobutyric acid transporter 2 in the hepatic uptake of taurine in rats. *Am J Physiol Gastrointest Liver*  
507 *Physiol* 303, G291-297.
- 508 Keren, L., Bosse, M., Marquez, D., Angoshtari, R., Jain, S., Varma, S., Yang, S.R., Kurian, A., Van  
509 Valen, D., West, R., *et al.* (2018). A Structured Tumor-Immune Microenvironment in Triple Negative  
510 Breast Cancer Revealed by Multiplexed Ion Beam Imaging. *Cell* 174, 1373-1387 e1319.
- 511 Kessner, D., Chambers, M., Burke, R., Agus, D., and Mallick, P. (2008). ProteoWizard: open source  
512 software for rapid proteomics tools development. *Bioinformatics* 24, 2534-2536.
- 513 Kietzmann, T. (2017). Metabolic zonation of the liver: The oxygen gradient revisited. *Redox Biol* 11,  
514 622-630.
- 515 Labrada, M., Dorvignit, D., Hevia, G., Rodríguez-Zhurbenko, N., Hernández, A.M., Vázquez, A.M., and  
516 Fernández, L.E. (2018). GM3(Neu5Gc) ganglioside: an evolution fixed neoantigen for cancer  
517 immunotherapy. *Semin Oncol* 45, 41-51.
- 518 Lamers, W.H., Hilberts, A., Furt, E., Smith, J., Jonges, G.N., van Noorden, C.J., Janzen, J.W., Charles,  
519 R., and Moorman, A.F. (1989). Hepatic enzymic zonation: a reevaluation of the concept of the liver  
520 acinus. *Hepatology* 10, 72-76.
- 521 Longo, N., Frigeni, M., and Pasquali, M. (2016). Carnitine transport and fatty acid oxidation. *Biochim*  
522 *Biophys Acta* 1863, 2422-2435.

523 Mandrekar, J.N. (2010). Receiver operating characteristic curve in diagnostic test assessment. *J Thorac*  
524 *Oncol* 5, 1315-1316.

525 Mittendorfer, B. (2005). Sexual dimorphism in human lipid metabolism. *J Nutr* 135, 681-686.

526 Paradies, G., Paradies, V., De Benedictis, V., Ruggiero, F.M., and Petrosillo, G. (2014). Functional role  
527 of cardiolipin in mitochondrial bioenergetics. *Biochim Biophys Acta* 1837, 408-417.

528 Quistorff, B., Katz, N., and Witters, L.A. (1992). Hepatocyte heterogeneity in the metabolism of fatty  
529 acids: discrepancies on zonation of acetyl-CoA carboxylase. *Enzyme* 46, 59-71.

530 Race, A.M., Styles, I.B., and Bunch, J. (2012). Inclusive sharing of mass spectrometry imaging data  
531 requires a converter for all. *J Proteomics* 75, 5111-5112.

532 Radtke, A.J., Kandov, E., Lowekamp, B., Speranza, E., Chu, C.J., Gola, A., Thakur, N., Shih, R., Yao,  
533 L., Yaniv, Z.R., *et al.* (2020). IBEX: A versatile multiplex optical imaging approach for deep  
534 phenotyping and spatial analysis of cells in complex tissues. *Proc Natl Acad Sci U S A* 117, 33455-  
535 33465.

536 Rappez, L., Stadler, M., Triana, S., Gathungu, R.M., Ovchinnikova, K., Phapale, P., Heikenwalder, M.,  
537 and Alexandrov, T. (2021). SpaceM reveals metabolic states of single cells. *Nat Methods* 18, 799-805.

538 Rozenblatt-Rosen, O., Regev, A., Oberdoerffer, P., Nawy, T., Hupalowska, A., Rood, J.E., Ashenberg,  
539 O., Cerami, E., Coffey, R.J., Demir, E., *et al.* (2020). The Human Tumor Atlas Network: Charting  
540 Tumor Transitions across Space and Time at Single-Cell Resolution. *Cell* 181, 236-249.

541 Sheraz, S., Tian, H., Vickerman, J.C., Blenkinsopp, P., Winograd, N., and Cumpson, P. (2019).  
542 Enhanced Ion Yields Using High Energy Water Cluster Beams for Secondary Ion Mass Spectrometry  
543 Analysis and Imaging. *Anal Chem* 91, 9058-9068.

544 Simons, K., and Ehehalt, R. (2002). Cholesterol, lipid rafts, and disease. *J Clin Invest* 110, 597-603.

545 Sirma, H., Williams, G.M., and Gebhardt, R. (1996). Strain- and sex-specific variations in hepatic  
546 glutamine synthetase activity and distribution in rats and mice. *Liver* 16, 166-173.

547 Smith, C.A., O'Maille, G., Want, E.J., Qin, C., Trauger, S.A., Brandon, T.R., Custodio, D.E., Abagyan,  
548 R., and Siuzdak, G. (2005). METLIN: a metabolite mass spectral database. *Ther Drug Monit* 27, 747-  
549 751.

550 Soares, A.F., Paz-Montoya, J., Lei, H., Moniatte, M., and Gruetter, R. (2017). Sexual dimorphism in  
551 hepatic lipids is associated with the evolution of metabolic status in mice. *NMR Biomed* 30.

552 Sud, M., Fahy, E., Cotter, D., Brown, A., Dennis, E.A., Glass, C.K., Merrill, A.H., Jr., Murphy, R.C.,  
553 Raetz, C.R., Russell, D.W., *et al.* (2007). LMSD: LIPID MAPS structure database. *Nucleic Acids Res*  
554 *35*, D527-532.

555 Takats, Z., Wiseman, J.M., and Cooks, R.G. (2005). Ambient mass spectrometry using desorption  
556 electrospray ionization (DESI): instrumentation, mechanisms and applications in forensics, chemistry,  
557 and biology. *J Mass Spectrom* *40*, 1261-1275.

558 Taylor, M.J., Lukowski, J.K., and Anderton, C.R. (2021). Spatially Resolved Mass Spectrometry at the  
559 Single Cell: Recent Innovations in Proteomics and Metabolomics. *J Am Soc Mass Spectrom* *32*, 872-  
560 894.

561 Tian, H., Sheraz Nee Rabbani, S., Vickerman, J.C., and Winograd, N. (2021). Multiomics Imaging  
562 Using High-Energy Water Gas Cluster Ion Beam Secondary Ion Mass Spectrometry [(H<sub>2</sub>O)<sub>n</sub>-GCIB-  
563 SIMS] of Frozen-Hydrated Cells and Tissue. *Anal Chem* *93*, 7808-7814.

564 Tian, H., Sparvero, L.J., Blenkinsopp, P., Amoscato, A.A., Watkins, S.C., Bayır, H., Kagan, V.E., and  
565 Winograd, N. (2019). Secondary-Ion Mass Spectrometry Images Cardiolipins and  
566 Phosphatidylethanolamines at the Subcellular Level. *Angew Chem Int Ed Engl* *58*, 3156-3161.

567 Trefts, E., Gannon, M., and Wasserman, D.H. (2017). The liver. *Curr Biol* *27*, R1147-R1151.

568 Uranbileg, B., Kurano, M., Sato, M., Ikeda, H., Ishizawa, T., Hasegawa, K., Kokudo, N., and Yatomi,  
569 Y. (2020). Possible involvement of PS-PLA1 and lysophosphatidylserine receptor (LPS1) in  
570 hepatocellular carcinoma. *Sci Rep-Uk* *10*.

571 Wang, F., Flanagan, J., Su, N., Wang, L.C., Bui, S., Nielson, A., Wu, X., Vo, H.T., Ma, X.J., and Luo,  
572 Y. (2012). RNAscope: a novel in situ RNA analysis platform for formalin-fixed, paraffin-embedded  
573 tissues. *J Mol Diagn* *14*, 22-29.

574 Winograd, N. (2018). Gas Cluster Ion Beams for Secondary Ion Mass Spectrometry. *Annu Rev Anal*  
575 *Chem (Palo Alto Calif)* *11*, 29-48.

576 Wishart, D.S., Guo, A., Oler, E., Wang, F., Anjum, A., Peters, H., Dizon, R., Sayeeda, Z., Tian, S., Lee,  
577 B.L., *et al.* (2022). HMDB 5.0: the Human Metabolome Database for 2022. *Nucleic Acids Res* *50*,  
578 D622-D631.

579

## 580 **Acknowledgments**

581 This research was supported by NIH HubMAP (1UG3CA256962-01). We thank our colleague, Dr.  
582 Andrea J. Radtke from NIH who provided insight and expertise in liver antibody panel. We would also

583 like to show our gratitude to Dr. Dan Graham from the University of Washington and Dr. Nathan H.  
584 Patterson from Vanderbilt University for sharing their expertise in MSI data processing.

585

### 586 **Author contributions**

587 HT, PR and BRS designed the multimodal imaging workflow for liver tissue study. HT conceived the  
588 dual-SIMS imaging workflow, established the lanthanide-conjugated antibody panel and immunostaining  
589 protocol, and performed tissue immunostaining, SIMS data acquisition and general/discriminant  
590 processing. PR optimized sample processing for multimodal imaging, performed sample preparation,  
591 DESI imaging and data analysis, lipidomic experiment and data analysis and multimodal data comparison.  
592 JT developed the software platform and algorithm for data processing, image registration and  
593 segmentation under the supervision of HT. AMD performed RNAScope imaging and analysis. TVN  
594 performed cryosectioning and assessed IHC data with PR. TA performed MALDI imaging. FZ contributed  
595 to lipidomic experiments. TVN and JD performed mouse tissue sample preparation. HR performed tissue  
596 identification, pathological analysis and annotation of tissue structure. NW provided the SIMS  
597 instrumentation. HT, PR and BRS drafted and edited the paper. BRS supervised the project. HT and PR  
598 contributed equally.

599

### 600 **Declaration of interests**

601 B.R.S. is an inventor on patents and patent applications involving small molecule drug discovery,  
602 ferroptosis, and immunostaining, co-founded and serves as a consultant to Inzen Therapeutics, Exarta  
603 Therapeutics, and ProJenX Inc, and serves as a consultant to Weatherwax Biotechnologies Corporation  
604 and Akin Gump Strauss Hauer & Feld LLP. All other authors declare no competing financial interests.

605

606

607

608

609

610

611

612

613

614

615

616

## 617 **Figure Legends**

618 Figure 1. Schematics of MSI-centric multimodal imaging workflow reveals 2D/3D biomolecular atlas of  
619 human liver. Consecutive sections from liver tissue blocks are assessed by A, DESI-MSI exhibiting the  
620 distribution of lipids and metabolites within histologically defined structural units of liver within the tissue  
621 architecture and B, SIMS-MSI including (H<sub>2</sub>O)<sub>n</sub>-GCIB-SIMS for lipid and metabolite imaging at single  
622 cell resolution followed by C60-SIMS on the same tissue section, followed by image integration and single  
623 cell specific lipid and metabolite extraction C, Validation of lipids detected by DESI and SIMS and D,  
624 structural elucidation by UPLC-MSE lipidomics on liver tissue section homogenate E, The 2D images  
625 from DESI and SIMS are aligned for 3D reconstruction and visualization.

626

627 Figure 2. DESI MSI reveals periportal and pericentral specific lipids and metabolites in mouse and human  
628 liver. Ai, H&E staining performed on a normal mouse liver section to identify the central vein (CV) and  
629 portal triad (PT) regions. Aii, RNAScope is performed on a consecutive tissue section stained for  
630 expression of Albumin (Alb-yellow) and Glutamine Synthetase (Glul- magenta) showing differential  
631 staining for periportal (PP) and pericentral (PC) regions respectively. Aiii, Av, Spatial segmentation of  
632 pixels based on distribution of a few lipids and metabolites from DESI-MSI in (Aiii) negative and (Av)  
633 positive ion mode. (Aiv, Avi) Distribution of a few lipids and metabolites showing PC and PP specificity  
634 in both ion modes are shown. B, Heatmap depicting the predictive performance of features measured by  
635 AUC-ROC (in rows) and classification (in columns) from DESI for PP and PC regions in female (n=3)  
636 and male (n=3) mice liver sections. C, Fold change values comparing the mean intensity of PC versus PP  
637 regions for the features from (B) Error bars represent mean  $\pm$  standard deviation. D, H&E section with  
638 manual annotation of CV and PT regions in human liver section. The corresponding images for  
639 distribution of different classes of lipids are shown. E, Distribution of lipids in consecutive sections for 3-  
640 dimensional visualization of lipids as shown in Supp video1.

641

642 Figure 3 Dual high-resolution SIMS imaging delineates the metabolomic and lipidomic states in different  
643 cell types on the mouse liver section. Ai, H&E staining image of central vein (CV) and portal vein (PV)  
644 region. Aii, Representative color overlay images of Dual-SIMS. Metabolites and lipids image in the same

645 region as in Ai on a serial frozen-hydrated section using  $(\text{H}_2\text{O})_{n(n=30k)}$ -GCIB-SIMS at the spatial resolution  
646 of 3  $\mu\text{m}$ , Blue, PI 38:4; Magenta, Taurocholic acid ; Yellow, PS 40:6; Green, HEME B. More single specie  
647 images are in Figure S6. Proteins image by lanthanides-conjugated antibodies from the region highlighted  
648 in the red box using  $\text{C}_{60}$ -SIMS at the spatial resolution of 1  $\mu\text{m}$ , Red, CD45 and CD11b; Yellow, GFAP;  
649 White, LYVE-1; Magenta, F4/80 and CD68; Cyan, EGFR and Na/KATPase; Green, Glul; Blue, Nuclei.  
650 Scale bar 100  $\mu\text{m}$ . Aiii, Registration of dual-SIMS images for alignment; Single cell segmentation using  
651 DeepCell. More details are described in supplementary Figures S16 and S17. B, Intensities changes of  
652 various species from the center of CV to PV (as the blue line in A i). C, HCA map shows the variation of  
653 different metabolites/lipids in various types of cells. Di, tSNE clustering to classify the cell types as in  
654 cluster 1-8 by lipids and metabolites only. Dii, Correlation of cluster 1-8 to 9 protein markers.

655

656 Figure 4. Dual high-resolution SIMS imaging delineates the metabolomic and lipidomic states in different  
657 cell types on the human liver tissue section. Ai, H&E image. The selected region contains the central vein  
658 and portal vein. Aii, Representative color overlay images of Dual-SIMS. Metabolites and lipids image in  
659 the same region as in Ai on a serial frozen-hydrated section using  $(\text{H}_2\text{O})_{n(n=30k)}$ -GCIB-SIMS at the spatial  
660 resolution of 3  $\mu\text{m}$ , Blue, PS 36:1; Magenta, PI 38:4; Green, HEME B. More single specie images are in  
661 Figure S10. Proteins image by lanthanides-conjugated antibodies from the same region after  $(\text{H}_2\text{O})_{n(n=30k)}$ -  
662 GCIB-SIMS using  $\text{C}_{60}$ -SIMS at spatial resolution of 1  $\mu\text{m}$ , Red, CD45 and CD11b; Magenta, GFAP;  
663 White, LYVE-1; Yellow, Heppar-1; Cyan, EGFR and Na/KATPase; Green, Glul; Blue, Nuclei. Aiii, The  
664 image alignment and registration of dual-SIMS images (i.e., Aii and Aiii). More details are described in  
665 supplementary Figures S16 and S17. B, HCA map shows the variation of different metabolites/lipids in  
666 different types of cells. Ci, tSNE clustering to classify the cell types as in cluster 1-8 by lipids and  
667 metabolites only. Cii, Correlation of cluster 1-8 to 15 protein markers.

668

669

670

671

672

673

674

675

676

677

678 **Table 1. Validation of lipid ion species from SIMS and DESI-MSI with MALDI-MSI and LC-**  
 679 **MS/MS**

| Pericentral vein region                                      |                           |                      |                     | Periportal vein region                                       |                           |                      |                     |
|--------------------------------------------------------------|---------------------------|----------------------|---------------------|--------------------------------------------------------------|---------------------------|----------------------|---------------------|
| (H <sub>2</sub> O) <sub>n</sub> -GCIB-SIMS negative ion mode | MALDI Orbitrap validation | LC-MS precursor mass | LC-MS/MS validation | (H <sub>2</sub> O) <sub>n</sub> -GCIB-SIMS negative ion mode | MALDI Orbitrap validation | LC-MS precursor mass | LC-MS/MS validation |
| 303.23                                                       | FA C20:4                  | NA                   | NA                  | 255.23                                                       | FA C16:0                  | NA                   | NA                  |
| 311.23                                                       | FA C20:0                  | NA                   | NA                  | 279.23                                                       | FA C18:2                  | NA                   | NA                  |
| 742.53                                                       | PE 36:2                   | PE(18:0/18:2)        | NA                  | 283.26                                                       | FA C18:0                  | NA                   | NA                  |
| 766.54                                                       | PE 38:4                   | PE(18:0/20:4)        | NA                  | 514.28                                                       | Taurocholic acid          | NA                   | NA                  |
| 911.56                                                       | PI 40:5                   | PI(18:0/22:5)        | NA                  | 747.50                                                       | PA 40:6                   | PA(18:0/22:6)        | 747.48              |
| 913.58                                                       | PI 40:4                   | PI 40:4              | NA                  | 834.53                                                       | PS 40:6                   | PS(18:0/22:6)        | 834.53              |
| 857.51                                                       | PI 36:4                   | PI(16:0/20:4)        | NA                  | 835.53                                                       | PI 34:1                   | PI(12:0/22:1(11Z))   | 835.53              |
| 723.50                                                       | PA 38:4                   | PA(18:0/20:4)        | 723.48              | PA 18:2/20:2                                                 | 1454.03                   | CL 72:5              | NA                  |
| 810.53                                                       | PS 38:4                   | PS(18:0/20:4)        | 810.54              | PS 38:4                                                      | 1455.95                   | CL 72:4              | NA                  |
| 812.54                                                       | PS 38:3                   | NA                   | 812.55              | PS 38:3                                                      | 1480.94                   | CL 74:6              | NA                  |
| 885.55                                                       | PI 38:4                   | PI(18:0/20:4)        | 885.55              | PI 38:4                                                      | 1482.08                   | CL 74:5              | NA                  |
|                                                              |                           |                      |                     |                                                              | 1483.94                   | CL 74:4              | NA                  |
|                                                              |                           |                      |                     |                                                              | 1484.98                   | CL 74:4              | NA                  |
| DESI negative ion mode                                       | MALDI Orbitrap validation | LC-MS precursor mass | LC-MS/MS validation | DESI negative ion mode                                       | MALDI Orbitrap validation | LC-MS precursor mass | LC-MS/MS validation |
| 281.24                                                       | FA 18:1                   | NA                   | NA                  | 124.01                                                       | Taurine                   | NA                   | NA                  |
| 295.23                                                       | FA 18:2;O                 | NA                   | NA                  | 306.08                                                       | GSH                       | NA                   | NA                  |
| 293.21                                                       | FA 18:3;O                 | NA                   | NA                  | 762.51                                                       | PE 38:6                   | NA                   | 762.50              |
| 309.28                                                       | FA 20:1                   | NA                   | NA                  | 346.05                                                       | AMP/dGMP                  | NA                   | NA                  |
| 311.3                                                        | FA 20:0                   | NA                   | NA                  | 175.03                                                       | Ascorbic acid             | NA                   | NA                  |
| 307.26                                                       | FA 20:2                   | NA                   | NA                  | 514.28                                                       | ST 24:1;O5:T              | NA                   | NA                  |
|                                                              |                           |                      |                     | 512.27                                                       | Sulfoglycolithocholate    | NA                   | NA                  |
|                                                              |                           |                      |                     | 498.29                                                       | ST 24:1;O4:T              | NA                   | NA                  |
|                                                              |                           |                      |                     | 790.53                                                       | PE 40:6                   | PE(18:0/22:6)        | 790.53              |
| DESI positive ion mode                                       | MALDI Orbitrap validation | LC-MS precursor mass | LC-MS/MS validation | DESI positive ion mode                                       | MALDI Orbitrap validation | LC-MS precursor mass | LC-MS/MS validation |
| 647.46                                                       | DG 37:7                   | NA                   | 647.45              | DG 37:7                                                      | 818.50                    | PC 36:5              | PC 36:5             |
| 840.55                                                       | PC 39:7                   | NA                   | 840.55              | PC 39:7                                                      | 756.54                    | PC 32:0              | PC 34:3             |
| 848.54                                                       | PC 38:4                   | PC 38:4              | 848.55              | PC 38:4                                                      | 560.31                    | LPC 18:1             | NA                  |
| 633.48                                                       | DG 34:1                   | NA                   | 633.48              | DG 34:1                                                      | 562.32                    | LPC 18:0             | PC 18:0             |
| 631.46                                                       | DG 34:2                   | NA                   | 631.46              | DG 34:2                                                      | 518.32                    | LPC 16:0             | PC 16:0             |
| 659.49                                                       | DG 36:2                   | NA                   | 659.49              | DG 36:2                                                      | 760.58                    | PC 34:1              | PC 34:1             |
| 657.48                                                       | DG 36:3                   | NA                   | 657.48              | DG 36:3                                                      | 806.56                    | PC 38:6              | PC 36:3             |
| 655.46                                                       | DG 36:4                   | NA                   | 655.46              | DG 36:4                                                      | 542.32                    | LPC 18:2             | NA                  |
| 856.56                                                       | PC P-40:6                 | NA                   | 856.55              | PC P-40:6                                                    | 786.59                    | PC 36:2              | PE(36:2)            |

680

681

682

683

684

685

686

687

688 **STAR Methods**

689 **RESOURCE AVAILABILITY**

690

691 ***Lead contact***

692 Further information and requests for resources and reagents should be directed to and will be fulfilled by  
693 the lead contact, Hua Tian: hut3@psu.edu.

694

695 ***Materials availability***

696 This study did not generate new unique reagents.

697

698 ***Data and code availability***

699

- **Data availability**

700 Mass spectrometry imaging data are in standardized imzML format. SIMS data is available at  
701 doi:10.26207/6a38-tr35. DESI and SIMS data will also be available from  
702 <https://portal.hubmapconsortium.org> by end of July 2022. The software license is provided for analyzing  
703 the data using Ionoptika Analyser for up to 7 days. Please contact Ionoptika if you wish to use the software  
704 beyond 7 days via our Support e-mail ([support@ionoptika.co.uk](mailto:support@ionoptika.co.uk)). Accession numbers are listed in the key  
705 resources table.

- Any additional information required to reanalyze the data reported in this paper is available from  
707 the lead contact upon request.

708

709 **METHOD DETAILS**

710 **Tissue preparation.** Normal human liver sample from a 51-year-old female was retrieved from the  
711 Columbia University tissue bank, under a protocol approved by the Institutional Review Board and stored  
712 at -80°C until use. Mouse liver tissues were derived from 17 weeks old male (n=3) and female (n=3)  
713 C57/BL6 mice. The excised liver tissues were flash frozen on dry ice filled with hexane, and stored at -  
714 80°C until use. Small blocks of both human and mouse tissue were cryosectioned at 8-10µm thickness  
715 and thaw mounted on microscope glass slides for H&E, DESI and RNAScope analysis and gold-coated  
716 slides for SIMS analysis. For multimodal imaging, consecutive sections for DESI, H&E, SIMS and  
717 RNAScope were placed on the respective slides and stored at -80°C until analysis.

718

\* Corresponding authors: Hua Tian: hut3@psu.edu; Brent R. Stockwell: bstockwell@columbia.edu

# These authors contributed equally to this work

Lead contact for resource requirement: hut3@psu.edu



719 **Histology.** Tissue sections were stained with hematoxylin and eosin (H&E) staining at Columbia  
720 University Molecular Pathology Shared Resource facility, scanned at 20X magnification and histological  
721 examination was performed by a pathologist to annotate the anatomical structures.

722

723 **DESI MSI data acquisition and analysis.** All the experiments were performed on Synapt G2-Si QToF  
724 mass spectrometer (Waters, Milford, MA), coupled to a DESI ion source. Data was acquired in sensitivity  
725 mode in both positive and negative ion mode. The DESI parameters used were capillary voltage and  
726 sampling cone voltage of 0.65kV and 50V respectively, scan time of 0.145 sec/pixel, pixel size of 40  $\mu\text{m}^2$ ,  
727 DESI sprayer angle of 75°, nebulizing gas ( $\text{N}_2$ ) pressure of 0.3 PSLM. The solvent used was methanol:  
728 water 95:5 (v/v) with 0.01% formic acid and 20pg/ $\mu\text{l}$  leucine enkephalin, at a flow rate of 1.5  $\mu\text{l}/\text{min}$ .  
729 Tissue sections were dried in a desiccator for ~10 min prior to analysis. Peak picking and lockmass  
730 correction using the protonated ion of leucine enkephalin ( $[\text{M}+\text{H}]^+$ , m/z 556.2771) or the deprotonated  
731 molecular ion ( $[\text{M}-\text{H}]^-$ , m/z 554.2615) was implemented in MassLynx software (Waters, version 4.1). The  
732 centroided data files were converted to mzml using msconvert from Proteowizard(Kessner et al., 2008)  
733 followed by conversion to imzml format using imzMLConverter(Race et al., 2012). The imzml files were  
734 imported into the SCiLS lab software (Bruker, version 2021c) and subsequent data analysis was  
735 performed. Total ion count (TIC) normalization was performed and up to n peaks were selected of m/z  
736 intervals of  $\pm 0.03\text{Da}$  were selected. Spatial segmentation analysis was performed using bisecting k-means  
737 clustering on edge-preserving denoised data. Area under the receiver operator characteristic curve was  
738 also performed within the SCiLS platform.

739

740 **Untargeted Lipidomics sample preparation.** 20 mg of liver was homogenized using beadrupter and  
741 lipids were extracted using 1050ul of 1:2 ratio of ice-cold methanol containing 0.01% w/v butylated  
742 hydroxyl toluene and dichloromethane, vortex mixing and incubating the samples overnight at -20C. One  
743 volume of ice-cold water was added and mixed for phase separation followed by centrifugation. The lower  
744 organic phase containing lipids were collected in a new vial, dried under a gentle stream of nitrogen and  
745 stored at -80C until analysis. The samples were reconstituted in isopropanol: acetonitrile: water at the ratio  
746 of 11:9:2 v/v/v before analysis.

747

748 **Chromatographic separation and mass spectrometry analysis.** Lipidomics experiments were  
749 performed on Synapt G2-Si mass spectrometer equipped with Acquity UPLC system (Waters, Milford,

750 MA) in both positive and negative electrospray ion modes. The chromatographic separation was  
751 performed on Acquity UPLC BEH300 C18 column (1.7 $\mu$ m particle size, 2.1X100mm) (Waters, Milford,  
752 MA) over an 18 min gradient. The column temperature was set at 55C. A binary mobile phase consisted  
753 of (A) 60:40 v/v acetonitrile: water and (B) 85:10:5 v/v/v isopropanol/acetonitrile/water, each containing  
754 10mM ammonium acetate and 0.1% acetic acid. The gradient was initiated at 40% B, followed by linear  
755 gradient to 50% by 2min ramped up to 99%B by 18min, and the column was equilibrated for 2min to the  
756 initial condition. The flow rate was set at 400ul/min and injection volume was 2ul in positive mode and  
757 5ul in negative mode. Data was acquired on high-definition data independent mode with ion mobility  
758 (HDMS<sup>E</sup>), over the mass range of m/z 50 to 1200 Da and scan rate of 0.1sec per scan. The parameters  
759 used for mass spectrometry data acquisition is as follows: for positive and negative mode, capillary voltage  
760 and sampling cone voltage of 2.8kV and 35V; and 2.5kV and 32V were used respectively. The source and  
761 desolvation temperature were 120°C and 500°C respectively. Desolvation gas (N<sub>2</sub>) flow was set at 850  
762 L/hr. MS data was calibrated using leucine enkephalin infusion at a flow rate of 10 $\mu$ l/min. Default ion  
763 mobility settings were used. The low collision energy was set at 4 eV and high energy was 25-60 eV.  
764 Mass calibration was performed using sodium formate and collision cross section (CCS) calibration was  
765 performed using CCS Major mix (Waters).

766

767 **Lipid and metabolite identification.** The assignment of lipids and metabolites specific of selected ions  
768 from DESI-MSI were based on its assignment based on accurate mass and isotopic pattern score using  
769 Progenesis software (Waters Inc., Milford, MA). The accurate mass search against the available databases  
770 including Lipidmaps<sup>35</sup>, HMDB(Wishart et al., 2022) and Metlin(Smith et al., 2005) for [M+ (H/Na/K)]<sup>+</sup>  
771 adducts were searched in positive ion mode and [M-H]<sup>-</sup> adducts in negative ion mode. For UPLC-HDMS<sup>E</sup>  
772 lipidomics data, the assignment of the lipid features was based on retention time information, accurate  
773 mass as well as fragmentation information. Fragmentation match was made in Progenesis software, where  
774 fragmentation score and match were assessed. It was also performed in MS<sup>E</sup> dataviewer (Waters, Milford,  
775 MA), where the fragments were confirmed against the lipidmaps structure database (LMSD)(Sud et al.,  
776 2007) for the adducts mentioned above with mass tolerance of 5ppm. Finally, the accurate mass of DESI-  
777 MSI based ion was matched against the UPLC-HDMS<sup>E</sup> data for assignment.

778

779 **Successive SIMS imaging and data processing.**

780 **Cryogenic (H<sub>2</sub>O)<sub>n</sub>-GCIB-SIMS.** Both (H<sub>2</sub>O)<sub>n</sub>-GCIB and C<sub>60</sub>-SIMS were performed on a buncher-ToF  
781 instrument, J105 3D Chemical Imager (Ionoptika, Southampton, UK. Abbv. J105). The water cluster ion  
782 beam is pulsed through a pulser in the gun column, where the distance to the sample surface is 0.533 m.  
783 Beam tuning was assisted with an oscilloscope (Tektronix TDS 2024, USA) with detection by a secondary  
784 electron detector (SED). The singly-charged (H<sub>2</sub>O)<sub>n</sub> cluster size at beam energy of 70 kV with a time of  
785 flight (ToF) of 103 μs was calculated using the ToF equation as  $n = 30,900$  (Figure S15). The SED offset  
786 was 8 μs. Beam focus was measured by scanning a 1000 mesh grid (Agar Scientific, Essex, UK). The  
787 average beam spot sizes were calculated using 20/80 percent of maximum intensities and were  $1.60 \pm 0.01$   
788 μm and  $1.16 \pm 0.45$  μm for 70 keV (H<sub>2</sub>O)<sub>30k</sub><sup>+</sup> and 40 kV C<sub>60</sub><sup>+</sup>, respectively (Figure S14). The beam dither  
789 was adapted to match the image pixel size. The mass resolution  $m/\Delta m$  was 6875 around  $m/z$  100, and  
790 10,000~12,000 up to  $m/z$  2000. The live readout of mass resolution was from the software, Ionoptika  
791 SIMS Mainframe during the data acquisition.

792

793 The gold coated Si wafer with the frozen-hydrated mouse/human liver tissue section was plunged into  
794 liquid nitrogen and inserted to the pre-chilled cold sample stage in J105 instrument and kept at 100 K  
795 during GCIB-SIMS imaging. This cryogenic sample handling preserved the frozen-hydrated state thus  
796 maintaining the chemical gradients in the tissue section.

797

798 Guided by the anatomical features on the semi-serial H&E stained section, an area of interest was selected  
799 for SIMS imaging in negative ion mode using a 70 keV (H<sub>2</sub>O)<sub>30k</sub><sup>+</sup> beam. The acquisition was in negative  
800 ion mode with  $256 \times 256$  pixels using a  $2 \times 2$  tiled image mode for mouse liver tissue sections, or  $768 \times 768$   
801 pixels using a  $3 \times 3$  tiled image mode for human liver tissue sections. Each tile covers  $400 \times 400$  μm<sup>2</sup> ( $3.1$   
802 μm per pixel) for each section. With 1 pA of beam current and 296 shots per pixel, the ion doses were  
803  $3.01 \times 10^{12}$  ions/cm<sup>2</sup> each tile.

804

805 **Immunostaining.** The antibody panel, designed to identify the major cell types, immune cells, cell  
806 proliferation, structure and nuclei within the liver is described in Table S1 and S2. Briefly, after the  
807 (H<sub>2</sub>O)<sub>n</sub>-GCIB-SIMS profiling was performed, the frozen tissue was placed at -20 °C and 4 °C  
808 consecutively for 1 h each for temperature equilibration, followed by fixation in 4 % formalin solution at  
809 4 °C for 30 min. Non-specific protein binding was blocked with 3 % BSA (Bovine Serum Albumin) for  
810 45 min at room temperature. Overnight staining was then performed with the antibody cocktail solution

811 (750 ug/mL for each antibody) at 4 °C. The stained slide was washed with 0.2 % Triton X-100 in PBS  
812 (phosphate-buffered saline) 1X for 8 min before the final nuclear staining with Intercalator-Ir at 300  
813  $\mu$ L/section. After washing with double-distilled water for 10 min and air-drying for 30 min, the slide was  
814 again inserted into the SIMS instrument, this time for C<sub>60</sub> imaging. For immunohistochemistry, briefly,  
815 tissue sections were fixed in cold acetone, washed and incubated with 30% hydrogen peroxide. The  
816 sections were blocked with 10% goat serum and incubated with primary antibody for 90 mins followed  
817 by biotinylated secondary antibody at room temperature, with washing steps in between. This was  
818 followed by addition of avidin-biotin complex reagent and then DAB (3,3'-Diaminobenzidine) with  
819 washing between steps. The stained slide was washed with water and counterstained with hematoxylin,  
820 mounted with coverslip and scanned at 20x resolution.

821

822 **C<sub>60</sub>-SIMS.** High resolution images using 40 keV C<sub>60</sub><sup>+</sup> were then acquired on the same area previously  
823 profiled by the (H<sub>2</sub>O)<sub>n</sub>-GCIB-SIMS. The acquisition was conducted in positive mode to localize various  
824 cell types. This was achieved by spatially detecting unique *m/z* ions of the isotopic metal tags associated  
825 with cell-specific antibodies. To resolve single cells, the C<sub>60</sub><sup>+</sup> beam was finely focused to 1.0  $\mu$ m to image  
826 roughly the same area which has been analyzed by (H<sub>2</sub>O)<sub>n</sub>-GCIB. With the beam current of 5 pA and 1000  
827 shots per pixel, the ion dose was  $8.57 \times 10^{13}$  ions/cm<sup>2</sup>. The dwell time was 100 ms/pixel. The lanthanide  
828 tags from eight antibodies and the nuclear marker were detected at an adequate signal intensity to allow  
829 co-registration with lipid and metabolite ions detected by (H<sub>2</sub>O)<sub>n</sub>-GCIB-SIMS.

830

831 **SIMS Data processing.** Single mass channels from tiled C<sub>60</sub> and (H<sub>2</sub>O)<sub>n</sub>-GCIB-SIMS images were  
832 extracted using [Ionoptika's Analyze] and subsequently used for downstream processing, all performed  
833 with custom developed Python code. Co-registration of C<sub>60</sub> and (H<sub>2</sub>O)<sub>n</sub>-GCIB-SIMS images was by first  
834 selecting mass channels that demonstrated a representative morphology of the tissue and normalizing each  
835 to an intensity range of [0, 1]. Normalized images were registered using SimpleITK(Beare et al., 2018) (v  
836 2.0.2) to determine the best affine transform between the C<sub>60</sub> (fixed) and H<sub>2</sub>O (moving) images by  
837 minimizing the mean square difference using a gradient descent optimizer (Figure S16). All H<sub>2</sub>O channel  
838 data was then transformed to the C<sub>60</sub> image space. The general nuclear and membrane channels from the  
839 C<sub>60</sub> data set were then used to segment single cells using DeepCell(Bannon et al., 2021) (v 0.9.0). Since  
840 the (H<sub>2</sub>O)<sub>n</sub>-GCIB-SIMS data has been registered to the C<sub>60</sub> image space, the segmentation instances can  
841 be used to extract integrated counts of species in both SIMS data sets. Integrated protein expression from

842  $C_{60}$ -SIMS images was used to determine thresholds for cell classification (marker positive or negative)  
843 (Figure S17). Hierarchical clustering analysis (HCA) was performed with seaborn (v 0.11.1) on the  
844 integrated lipid and metabolite mass channels from the  $(H_2O)_n$ -GCIB-SIMS data set, using the cell types  
845 determined from the  $C_{60}$  image data (Figure S18).

846

847 **MALDI-MSI.** Chemicals and solvents (analytical grade) were purchased from the following sources:  $\alpha$ -  
848 Cyano-4-hydroxycinnamic acid 98% (CHCA) (Sigma Aldrich), 1,5-Diaminonaphthalene 97% (DAN)  
849 (Sigma Aldrich), acetonitrile (ACN) (Honeywell), chloroform (Acros Organics), methanol (Carl Roth),  
850 and trifluoroacetic acid (TFA) (Sigma Aldrich). All chemicals used in this study were stored, handled,  
851 and disposed of according to good laboratory practices (GLP).

852

853 Mouse and Human liver sections on ITO glass (Sigma, Milwaukee, WI, US) were stored at  $-80^\circ\text{C}$  until  
854 analysis. Prior to matrix application, the tissue sections were removed from the freezer, placed on a cold  
855 steel plate ( $-20^\circ\text{C}$ ) and freeze-dried in a desiccator for 30 minutes. The combination of steel plate and  
856 desiccator was efficient for removing the water from the tissue without compromising its structural  
857 integrity and limiting the migration of analytes. On the mouse liver section, DAN matrix (10 mg/ml,  
858 ACN:H<sub>2</sub>O 7:3) was applied. For the analysis of human liver, 2 section were coated in matrix, one with  
859 DAN (same as mouse) for negative ion mode and one with CHCA matrix (5mg/ml, CHCl<sub>3</sub>:MeOH 1:1)  
860 for positive ion mode analysis. Application was performed with an HTX TM sprayer (HTX Technologies  
861 LLC, USA), temperature:  $30^\circ\text{C}$  (Dan)/  $40^\circ\text{C}$  (CHCA), passes: 8 (DAN)/16 (CHCA), flow rate: 0.12  
862 ml/min, velocity: 1200 mm/min, drying time: 2 s, line spacing 2.5 mm.

863

864 AP-MALDI analysis was performed using an AP-MALDI UHR ion source (Masstech Inc., USA), which  
865 has been described in detail elsewhere,<sup>40,41</sup> coupled to an LTQ/Orbitrap Elite high-resolution mass  
866 spectrometer (Thermo-Fisher Scientific, USA) in positive and negative ion mode. For imaging, the AP-  
867 MALDI source was operated in “Constant Speed Raster” motion mode. To explore the detectable species  
868 and instrument settings for both ion modes, one whole mouse liver section was analyzed interlaced in  
869 positive and negative ion mode with a laser beam diameter of 20  $\mu\text{m}$  and a stepping size of 50  $\mu\text{m}$ , laser  
870 settings 2500 Hz, 5%. Spectrum acquisition parameters were 800 ms maximum injection time, mass range:  
871 500 – 2000 Da and mass resolution: 120k at  $m/z$  400. Human liver was analyzed with higher spatial  
872 resolution (15  $\mu\text{m}$  laser spot and stepping size) and positive (CHCA matrix, laser settings 500 Hz, 10%)

873 and negative (DAN matrix, laser settings 1500 Hz, 5%) ion mode analysis was performed on 2 separate,  
874 consecutive sections. Spectrum acquisition was adjusted to 500 ms maximum injection time, mass range:  
875 350 – 1550 Da and mass resolution: 120k at m/z 400. Species identification was performed with on-tissue  
876 tandem-MS with a 1.5 Da isolation window, and collision-induced dissociation/ higher-energy collision  
877 dissociation (CID/HCD) was performed with collision energies of 27-45%, adjusted for each species  
878 individually. Tandem-MS scans were summed up over 30-120 seconds. Data analysis and visualization  
879 was performed with Thermo Xcalibur 2.2 (Thermo-Fisher Scientific, USA), Multimaging<sup>TM</sup>  
880 (ImaBiotech, France), METASPACE,<sup>42</sup> and LipostarMSI (Molecular Horizons Srl, Italy).<sup>43</sup> Lipid  
881 identification was performed in LipostarMSI (database: LIPIDMAPS, mass accuracy: 2 ppm; mass and  
882 isotopic pattern score: 80%+).

883

884 **RNA Scope.** We captured transcription distributions of select liver cell marker genes via *in situ*  
885 hybridization of specific targeting probes with the RNA scope Multiplex Fluorescent v2 Assay Protocol<sup>27</sup>  
886 optimized for fresh-frozen samples. Our modifications to the commercial protocol included using half-  
887 concentration wash buffer (0.5X) for all wash steps downstream of probe incubation, and excluding the  
888 recommended protease step entirely. In mouse tissue, we spatially detected the transcripts for, ALB  
889 (Albumin), GLUL (Glutamine synthetase), and PTPRC (Protein Tyrosine Phosphatase Receptor Type C),  
890 and in human tissue, we spatially detected transcripts for GLUL, CD68 (Macrophage Antigen CD68), and  
891 LYVE1 (Lymphatic Vessel Endothelial Hyaluronan Receptor 1).

892

893 Tissue sections were first post-fixed with 4% paraformaldehyde (PFA) in phosphate buffered saline (PBS)  
894 and dehydrated in Ethanol (EtOH) immediately after fixation, immersed for 5 minutes at a time in 50%  
895 EtOH, 70% EtOH, 100% EtOH, and 100% EtOH an additional time. Samples were then air-dried and  
896 treated with RNA scope<sup>®</sup> Hydrogen Peroxide Reagent for ten minutes at 23°C to 25°C and washed twice  
897 with deionized water. Importantly, we excluded the commercial protease step because tissue integrity was  
898 lost, and we could achieve stronger signal without any protease treatment. These steps constitute the  
899 pretreatment steps.

900

901 These pretreated sample slides were incubated with prewarmed target probes (20 nmol/L of each oligo  
902 probe) overnight. In mouse tissue, ALB was targeted with RNA scope<sup>®</sup> Probe- Mm-Alb-C2 (ACD; Cat  
903 No. Cat No. 437691-C2), GLUL was targeted with RNA scope Probe- Mm-Glul (ACD; Cat No. 426231),

904 and PTPRC was targeted with RNAscope® Probe- Mm-Ptprc-C3 (ACD;Cat No. 318651-C3). In human  
905 tissue, GLUL was targeted with RNAscope® Probe- Hs-GLUL-No-XMm (ACD;Cat No. Cat No.  
906 511171), CD68 was targeted with RNAscope® Probe- Hs-CD68-C4 (ACD;Cat No. 560591-C4), and  
907 LYVE1 was targeted with RNAscope® Probe- Hs-LYVE1 (ACD;Cat No. 426911).

908

909 The tissue was incubated in the primary target probes overnight (18-21 hours) at 40°C inside the HybEZ  
910 hybridization oven (ACD). After overnight probe hybridization, samples were incubated in Amplifier 1  
911 (preamplifier) (2 nmol/L) in hybridization buffer B (20% formamide, 5× SSC, 0.3% lithium dodecyl  
912 sulfate, 10% dextran sulfate, blocking reagents) for 30 minutes; Amplifier 2 (2 nmol/L) in hybridization  
913 buffer B at 40°C for 15 minutes; and Amplifier 3 (label probe) (2 nmol/L) in hybridization buffer C (5×  
914 SSC, 0.3% lithium dodecyl sulfate, blocking reagents) for 15 minutes. After each hybridization step, slides  
915 were washed with 0.5X wash buffer (0.05× SSC, 0.015% lithium dodecyl sulfate) two times at room  
916 temperature. Chromogenic detection was performed utilizing a horseradish peroxidase (HPR) construct  
917 specific to each gene-dedicated imaging channel and a fluorescent Opal reagent of choice. For the mouse  
918 sections, ALB was stained with Opal 520 Reagent (Perkin Elmer, FP1487001KT), GLUL was stained  
919 with Opal 570 Reagent (Perkin Elmer, FP1488001KT), and PTPRC was stained with Opal 690 Reagent  
920 (Perkin Elmer, FP1488001KT). For the human sections, GLUL and LYVE1 were both stained with Opal  
921 520 Reagent (Perkin Elmer, FP1487001KT), thus needing to be imaged in separate tissue sections, and  
922 CD68 was stained with Opal 570 Reagent (Perkin Elmer, FP1488001KT). Each Opal reagent dye was  
923 diluted 1:1500 in RNAscope® Multiplex TSA Buffer. Nuclei were stained with DAPI (4',6-diamidino-2-  
924 phenylindole) and coverslips were mounted over slides in Fluoro-Gel (EMS; 17985-10) and imaged by  
925 spinning disc confocal microscopy and Aperio Versa 8 fluorescent slide scanner.

926

## 927 **Reference**

- 928 Bannon, D., Moen, E., Schwartz, M., Borba, E., Kudo, T., Greenwald, N., Vijayakumar, V., Chang, B.,  
929 Pao, E., Osterman, E., *et al.* (2021). DeepCell Kiosk: scaling deep learning-enabled cellular image  
930 analysis with Kubernetes. *Nat Methods* 18, 43-45.
- 931 Beare, R., Lowekamp, B., and Yaniv, Z. (2018). Image Segmentation, Registration and Characterization  
932 in R with SimpleITK. *J Stat Softw* 86.
- 933 Kessner, D., Chambers, M., Burke, R., Agus, D., and Mallick, P. (2008). ProteoWizard: open source  
934 software for rapid proteomics tools development. *Bioinformatics* 24, 2534-2536.
- 935 Race, A.M., Styles, I.B., and Bunch, J. (2012). Inclusive sharing of mass spectrometry imaging data  
936 requires a converter for all. *J Proteomics* 75, 5111-5112.

937 Smith, C.A., O'Maille, G., Want, E.J., Qin, C., Trauger, S.A., Brandon, T.R., Custodio, D.E., Abagyan,  
 938 R., and Siuzdak, G. (2005). METLIN: a metabolite mass spectral database. *Ther Drug Monit* 27, 747-  
 939 751.  
 940 Sud, M., Fahy, E., Cotter, D., Brown, A., Dennis, E.A., Glass, C.K., Merrill, A.H., Jr., Murphy, R.C.,  
 941 Raetz, C.R., Russell, D.W., *et al.* (2007). LMSD: LIPID MAPS structure database. *Nucleic Acids Res*  
 942 35, D527-532.  
 943 Wishart, D.S., Guo, A., Oler, E., Wang, F., Anjum, A., Peters, H., Dizon, R., Sayeeda, Z., Tian, S., Lee,  
 944 B.L., *et al.* (2022). HMDB 5.0: the Human Metabolome Database for 2022. *Nucleic Acids Res* 50,  
 945 D622-D631.

946

947 **KEY RESOURCES TABLE**

| REAGENT or RESOURCE        |               | SOURCE                      | IDENTIFIER                                                                                    |                          |
|----------------------------|---------------|-----------------------------|-----------------------------------------------------------------------------------------------|--------------------------|
| Antibodies for mouse liver |               |                             |                                                                                               |                          |
| Metal tag                  | Target        | Clone/Host                  | Cell/Pathway                                                                                  | Manufacturer/Catalog No. |
| 89Y                        | CD45          | 30-F11, Rat IgG2b           | Pan leukocyte                                                                                 | Fluidigm/3089005B        |
| 142Nd                      | Heppar-1/CPS1 | HepPar1, mouse monoclonal   | Periportal hepatocytes (Zone 1)                                                               | Novus/NBP3-08970         |
| 143Nd                      | GFAP          | EPR1034Y, Rabbit monoclonal | Ito Stellate Cells                                                                            | Abcam/ab218309           |
| 147Sm                      | GS            | ab240193,Rabbit monoclonal  | Pericentral hepatocytes (Zone 3)                                                              | Abcam/ab240193           |
| 152Sm                      | F4/80         | CI:A3-1, Mouse IgG2b        | Kupffer cells                                                                                 | Abcam/ab6640             |
| 155Gd                      | CD11b         | M1/70, Rat IgG              | Leukocytes                                                                                    | Ionpath/ 715503-100      |
| 156Gd                      | CD68          | FA-11, Mouse IgG2b          | Macrophages                                                                                   | Abcam/ ab237968          |
| 174Yb                      | LYVE1         | Rabbit polyclonal           | Sinusoidal endothelial cells                                                                  | Novus/ NB600-1008        |
| 176Yb                      | EGFR          | EP38Y, Rabbit monoclonal    | Cell membrane                                                                                 | Abcam/ ab272293          |
| 176Yb                      | Na/K ATPase   | EP1845Y, Rabbit monoclonal  | Cell membrane                                                                                 | Abcam/ab167390           |
| 191 Ir                     | Nuclear DNA   |                             | Nuclei                                                                                        | Fluidigm/ 201192B        |
| Antibody for Human liver   |               |                             |                                                                                               |                          |
| Metal tag                  | Target        | Clone/Host                  | Cell/Pathway                                                                                  | Manufacturer/Catalog No. |
| 89Y                        | CD45          | D9M8I, Rabbit IgG           | Pan leukocyte                                                                                 | Cell Signaling/13917S    |
| 113 In                     | CD4           | RPA-T4, mouse monoclonal    | T cells and macrophages                                                                       | Novus/NBP2-25199         |
| 141Pr                      | SMA           | 1A4, Mouse IgG2a            | Smooth muscle cells in vascular walls, sinusoidal endothelial cells and activated fibroblasts | Fluidigm/3141017D        |
| 143Nd                      | GFAP          | EPR1034Y, Rabbit monoclonal | Ito Stellate Cells                                                                            | Abcam/ab218309           |
| 145Nd                      | Heppar-1/CPS1 | HepPar1, mouse monoclonal   | Periportal hepatocytes (Zone 1)                                                               | Novus/NBP3-08970         |
| 147Sm                      | GS            | ab240193,Rabbit monoclonal  | Pericentral hepatocytes (Zone 3)                                                              | Abcam/ab240193           |
| 148Nd                      | CD31          | JC/70A, Mouse monoclonal    | Endothelial cells                                                                             | Abcam/ab264090           |
| 151Eu                      | CD68          | D4B9C,Rabbit IgG            | Macrophages                                                                                   | Cell Signaling/76437S    |



|                                |             |                                 |                                                         |                                                                                                     |
|--------------------------------|-------------|---------------------------------|---------------------------------------------------------|-----------------------------------------------------------------------------------------------------|
| <b>153Eu</b>                   | CD32        | FUN-2, Mouse IgG2b              | B cells, monocytes, granulocytes and platelets          | Fluidigm/3153018B                                                                                   |
| <b>158Gd</b>                   | Arginase1   | D4E3M™, Rabbit IgG              | Zone 1-2 hepatocytes, and macrophages                   | Cell Signaling/93668S                                                                               |
| <b>161Dy</b>                   | Albumin     | EPR20195, Rabbit monoclonal     | Periportal hepatocytes (Zone 1)                         | Abcam/Ab271979                                                                                      |
| <b>166Er</b>                   | CK19        | SPM561, Mouse monoclonal        | Cholangiocytes (Portal triad)                           | Abcam/ab212569                                                                                      |
| <b>169Tm</b>                   | CD34        | QBEND/10, Mouse / IgG1          | Endothelial cells                                       | Abcam/ ab198395                                                                                     |
| <b>170 Er</b>                  | EpCAM       | E6V8Y, Rabbit IgG               | Hepatic stem/progenitor cells                           | Cell Signaling /93790S                                                                              |
| <b>171Yb</b>                   | LYVE1       | EPR21857, Rabbit monoclonal     | Sinusoidal endothelial cells and subsets of macrophages | Abcam/ab232935                                                                                      |
| <b>176Yb</b>                   | EGFR        | EP38Y, Rabbit monoclonal        | Cell membrane                                           | Abcam/ ab272293                                                                                     |
| <b>176Yb</b>                   | Na/K ATPase | D4Y7E, Rabbit IgG               | Cell membrane                                           | Cell Signaling/ 23565S                                                                              |
| <b>191 Ir</b>                  | Nuclear DNA |                                 | Nuclei                                                  | Fluidigm/ 201192B                                                                                   |
| <b>196Pt</b>                   | Collagen I  | EPR7785, Rabbit monoclonal      | Connective tissue around portal triad                   | Abcam/ab215969                                                                                      |
| <b>Biological samples</b>      |             |                                 |                                                         |                                                                                                     |
| Health mouse liver             |             |                                 |                                                         | 17 weeks old male (n=3) and female (n=3) C57/BL6 mice                                               |
| Health human liver             |             | Columbia University tissue bank |                                                         | 51-year-old female                                                                                  |
|                                |             |                                 |                                                         |                                                                                                     |
|                                |             |                                 |                                                         |                                                                                                     |
| <b>Deposited data</b>          |             |                                 |                                                         |                                                                                                     |
| SIMS raw date                  |             | This paper                      |                                                         | doi:10.26207/6a38-tr35                                                                              |
| DESI raw date                  |             | This paper                      |                                                         |                                                                                                     |
| mRNA scope raw date            |             | This paper                      |                                                         |                                                                                                     |
|                                |             |                                 |                                                         |                                                                                                     |
| <b>Software and algorithms</b> |             |                                 |                                                         |                                                                                                     |
| Ionoptika Image Analyzer       |             | Ionoptika Ltd.                  |                                                         | <a href="https://ionoptika.com">https://ionoptika.com</a>                                           |
| ImagingSIMS                    |             | Jay Tarolli                     |                                                         | <a href="https://github.com/ImagingSIMS/ImagingSIMS">https://github.com/ImagingSIMS/ImagingSIMS</a> |
| DeepCell                       |             | Bryan Chan, et al               |                                                         | <a href="https://deepcell.com/">https://deepcell.com/</a>                                           |
| SCiLS                          |             | Bruker Corp.                    |                                                         | <a href="https://www.bruker.com/">https://www.bruker.com/</a>                                       |
| Progenesis                     |             | Waters Corp.                    |                                                         | <a href="https://www.waters.com/">https://www.waters.com/</a>                                       |
| MS <sup>E</sup> dataviewer     |             | Waters Corp.                    |                                                         | <a href="https://www.waters.com/">https://www.waters.com/</a>                                       |
|                                |             |                                 |                                                         |                                                                                                     |
| <b>Other</b>                   |             |                                 |                                                         |                                                                                                     |
|                                |             |                                 |                                                         |                                                                                                     |
|                                |             |                                 |                                                         |                                                                                                     |
|                                |             |                                 |                                                         |                                                                                                     |
|                                |             |                                 |                                                         |                                                                                                     |

950  
951  
952  
953  
954  
955  
956  
957  
958  
959  
960  
961  
962  
963  
964  
965  
966  
967  
968  
969  
970  
971  
972  
973  
974  
975  
976  
977  
978

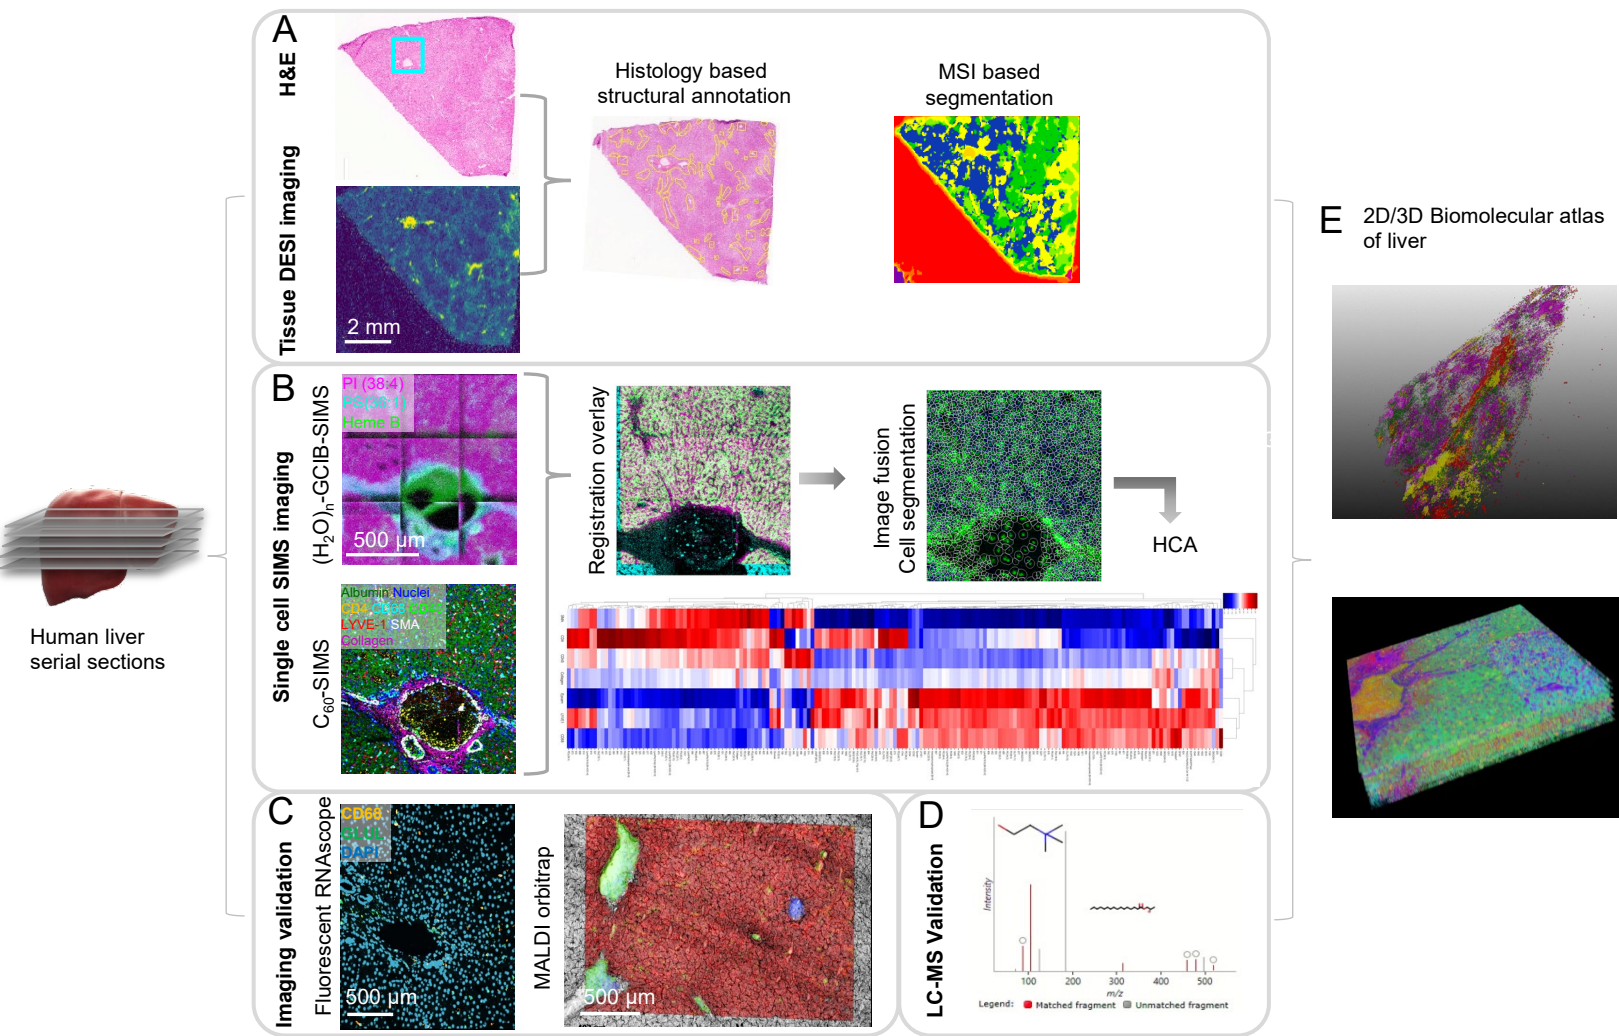

**Figure 1. Schematics of MSI-centric multimodal imaging workflow reveals 2D/3D biomolecular atlas of human liver.** Consecutive sections from liver tissue blocks are assessed by **A**, DESI-MSI exhibiting the distribution of lipids and metabolites within histologically defined structural units of liver within the tissue architecture and **B**, SIMS-MSI including  $(\text{H}_2\text{O})_n$ -GCIB-SIMS for lipid and metabolite imaging at single cell resolution followed by  $\text{C}_{60}$ -SIMS on the same tissue section, followed by image integration and single cell specific lipid and metabolite extraction **C**, Validation of lipids detected by DESI and SIMS and **D**, structural elucidation by UPLC-MS<sup>E</sup> lipidomics on liver tissue section homogenate **E**, The 2D images from DESI and SIMS are aligned for 3D reconstruction and visualization.

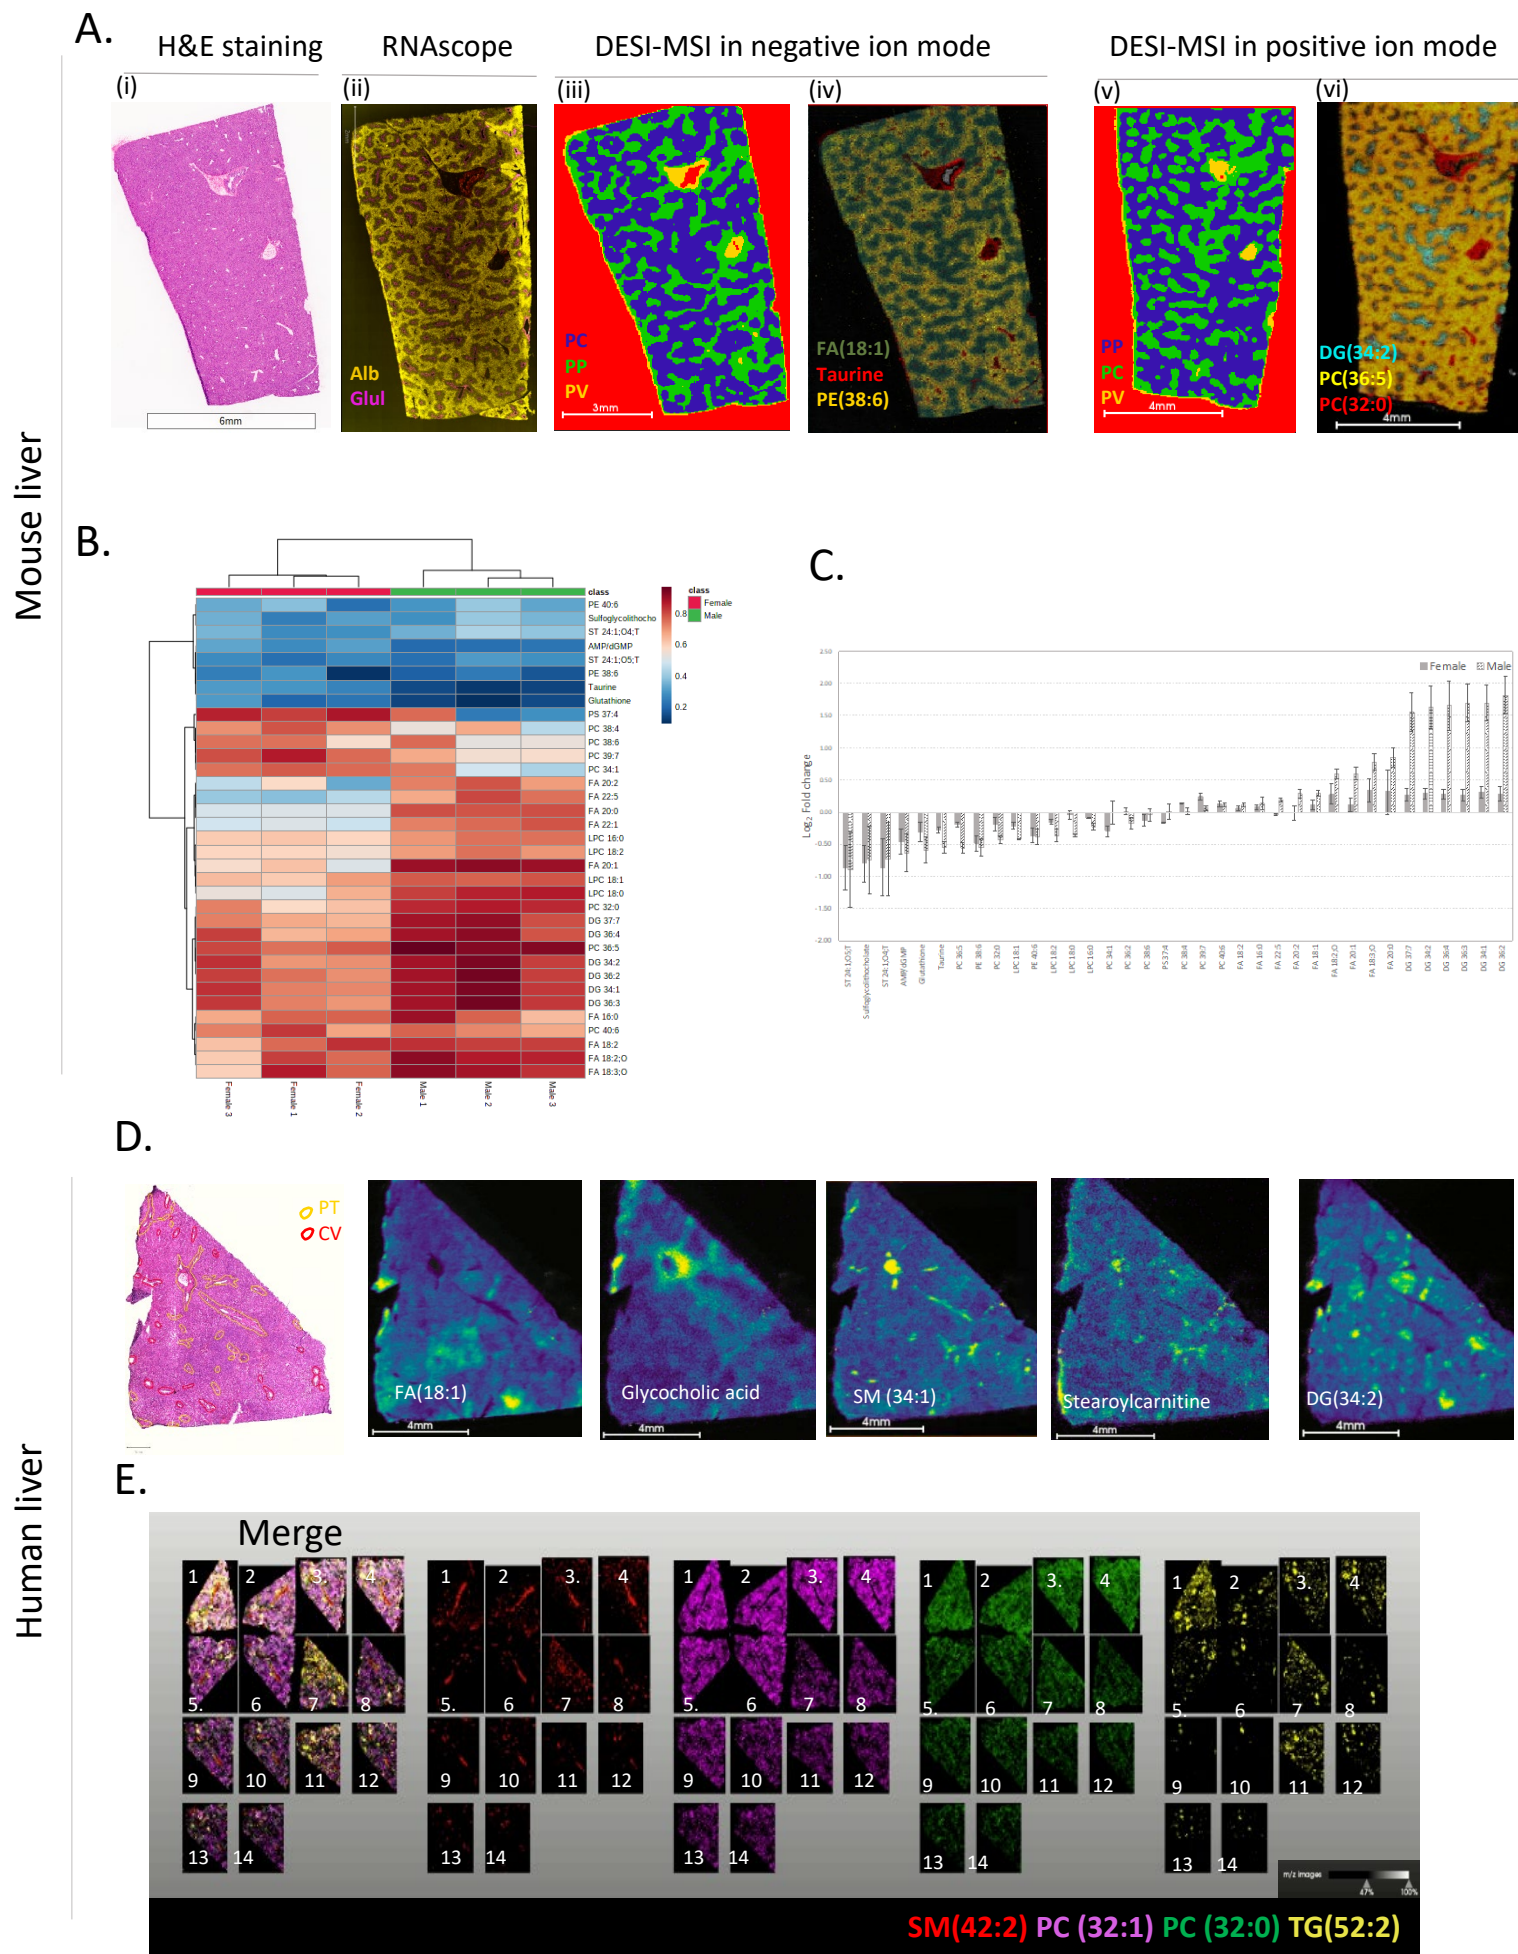

**Figure 2. DESI MSI reveals periportal and pericentral specific lipids and metabolites in mouse and human liver.** **Ai**, H&E staining performed on a normal mouse liver section to identify the central vein (CV) and portal triad (PT) regions. **Aii**, RNAScope is performed on a consecutive tissue section stained for expression of Albumin (Alb- yellow) and Glutamine Synthetase (Glul- magenta) showing differential staining for periportal (PP) and pericentral (PC) regions respectively. **Aiii**, **Av**, Spatial segmentation of pixels based on distribution of a few lipids and metabolites from DESI-MSI in (**Aiii**) negative and (**Av**) positive ion mode. (**Aiv**, **Avi**) Distribution of a few lipids and metabolites showing PC and PP specificity in both ion modes are shown. **B**, Heatmap depicting the predictive performance of features measured by AUC-ROC (in rows) and classification (in columns) from DESI for PP and PC regions in female (n=3) and male (n=3) mice liver sections. **C**, Fold change values comparing the mean intensity of PC versus PP regions for the features from (**B**) Error bars represent mean  $\pm$  standard deviation. **D**, H&E section with manual annotation of CV and PT regions in human liver section. The corresponding images for distribution of different classes of lipids are shown. **E**, Distribution of lipids in consecutive sections for 3-dimensional visualization of lipids as shown in Supp video1.

**A i** H&E image of ROI

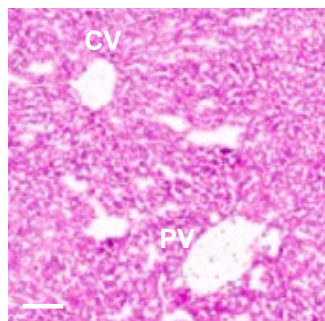

**A ii** (H<sub>2</sub>O)<sub>n</sub>-GCIB-SIMS for lipids/metabolites  
C<sub>60</sub>-SIMS for proteins on the same tissue

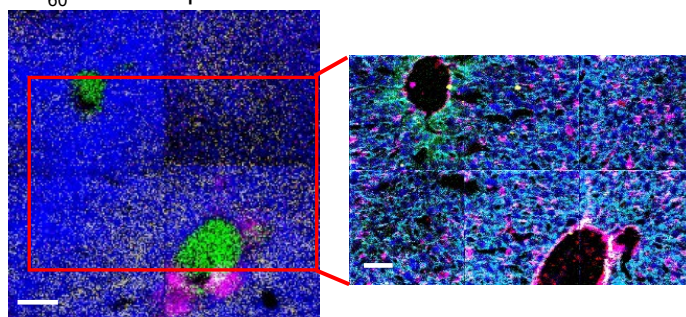

**A iii** Image registration  
DeepCell cell segmentation

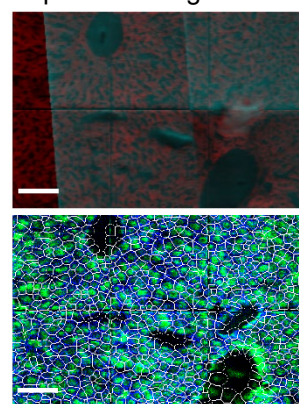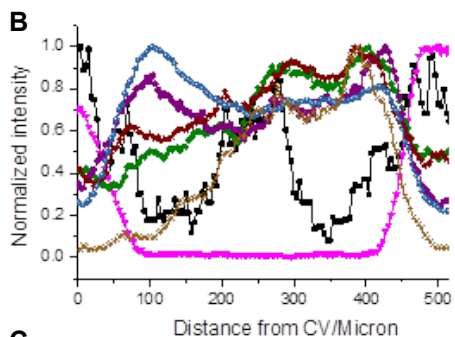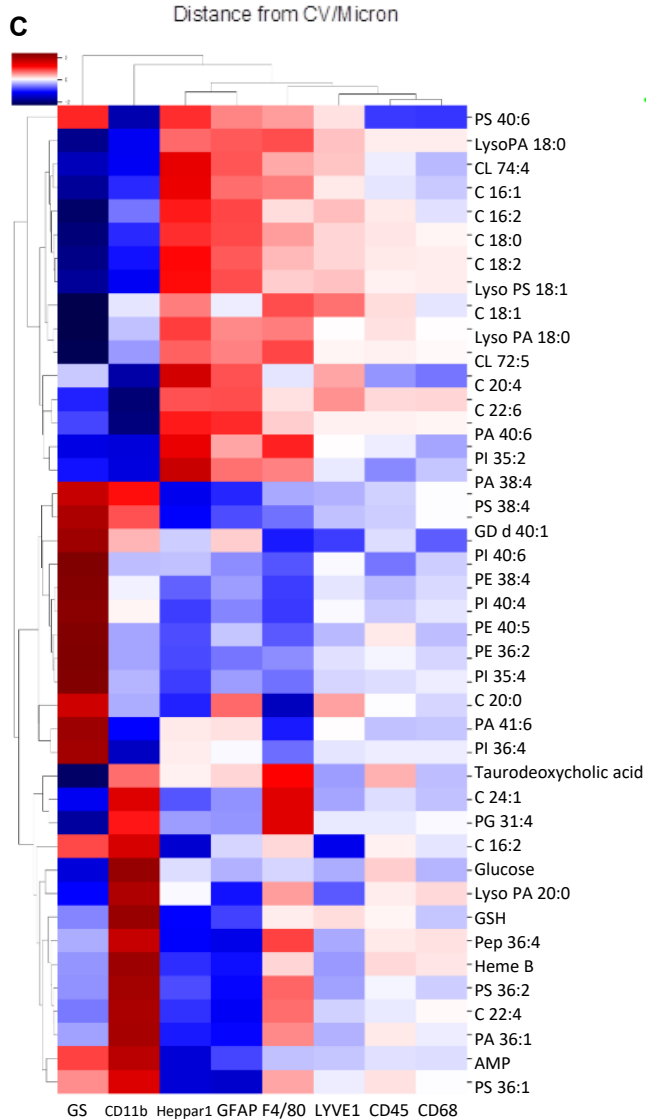

**D i**

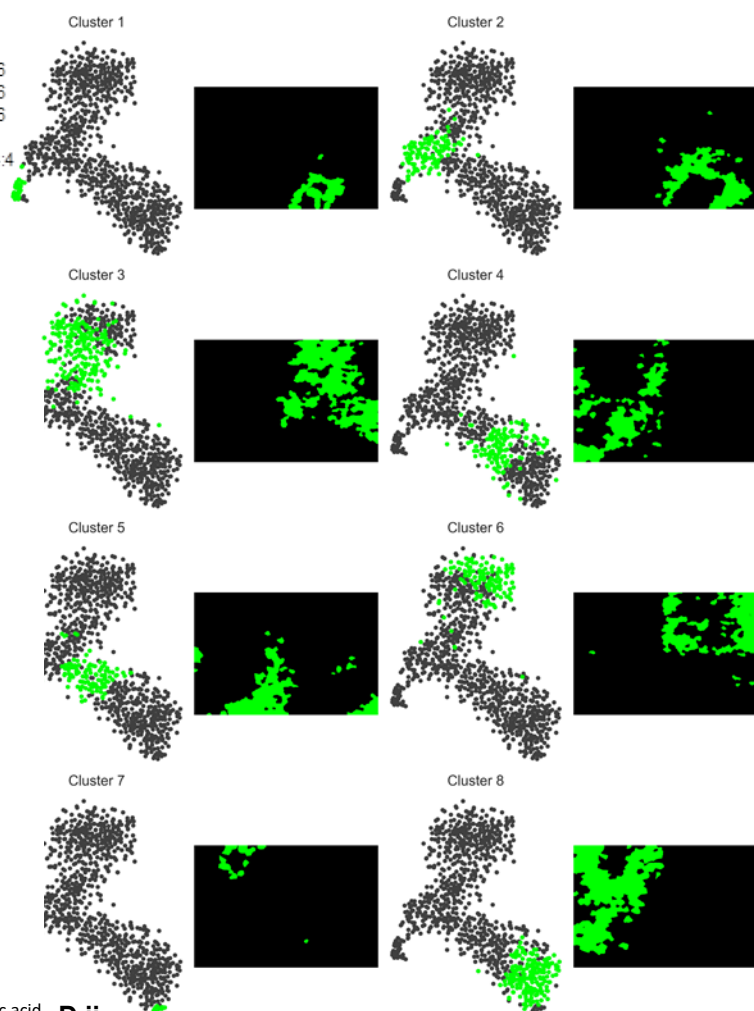

**D ii**

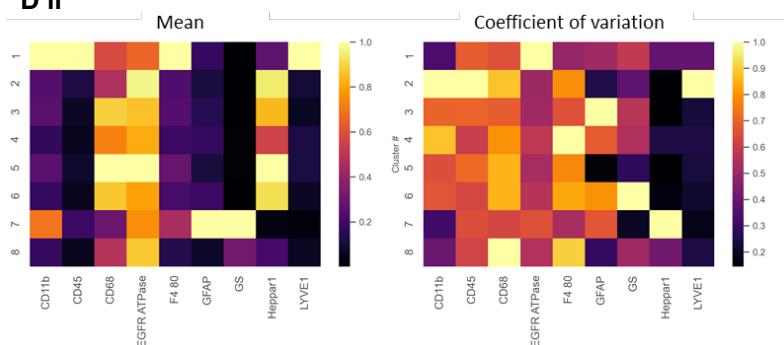

**Figure 3 Dual high-resolution SIMS imaging delineates the metabolomic and lipidomic states in different cell types on the mouse liver section. Ai**, H&E staining image of central vein (CV) and portal vein (PV) region. **Aii**, Representative color overlay images of Dual-SIMS. Metabolites and lipids image in the same region as in Ai on a serial frozen-hydrated section using  $(\text{H}_2\text{O})_{n(n=30k)}$ -GCIB-SIMS at the spatial resolution of 3  $\mu\text{m}$ , Blue, PI 38:4; Magenta, Taurocholic acid ; Yellow, PS 40:6; Green, HEME B. More single specie images are in Figure S6. Proteins image by lanthanides-conjugated antibodies from the region highlighted in the red box using  $\text{C}_{60}$ -SIMS at the spatial resolution of 1  $\mu\text{m}$ , Red, CD45 and CD11b; Yellow, GFAP; White, LYVE-1; Magenta, F4/80 and CD68; Cyan, EGFR and Na/KATPase; Green, Glul; Blue, Nuclei. Scale bar 100  $\mu\text{m}$ . **Aiii**, Registration of dual-SIMS images for alignment; Single cell segmentation using DeepCell. More details are described in supplementary Figures S16 and S17. **B**, Intensities changes of various species from the center of CV to PV (as the blue line in A i). **C**, HCA map shows the variation of different metabolites/lipids in various types of cells. **Di**, tSNE clustering to classify the cell types as in cluster 1-8 by lipids and metabolites only. **Dii**, Correlation of cluster 1-8 to 9 protein markers.

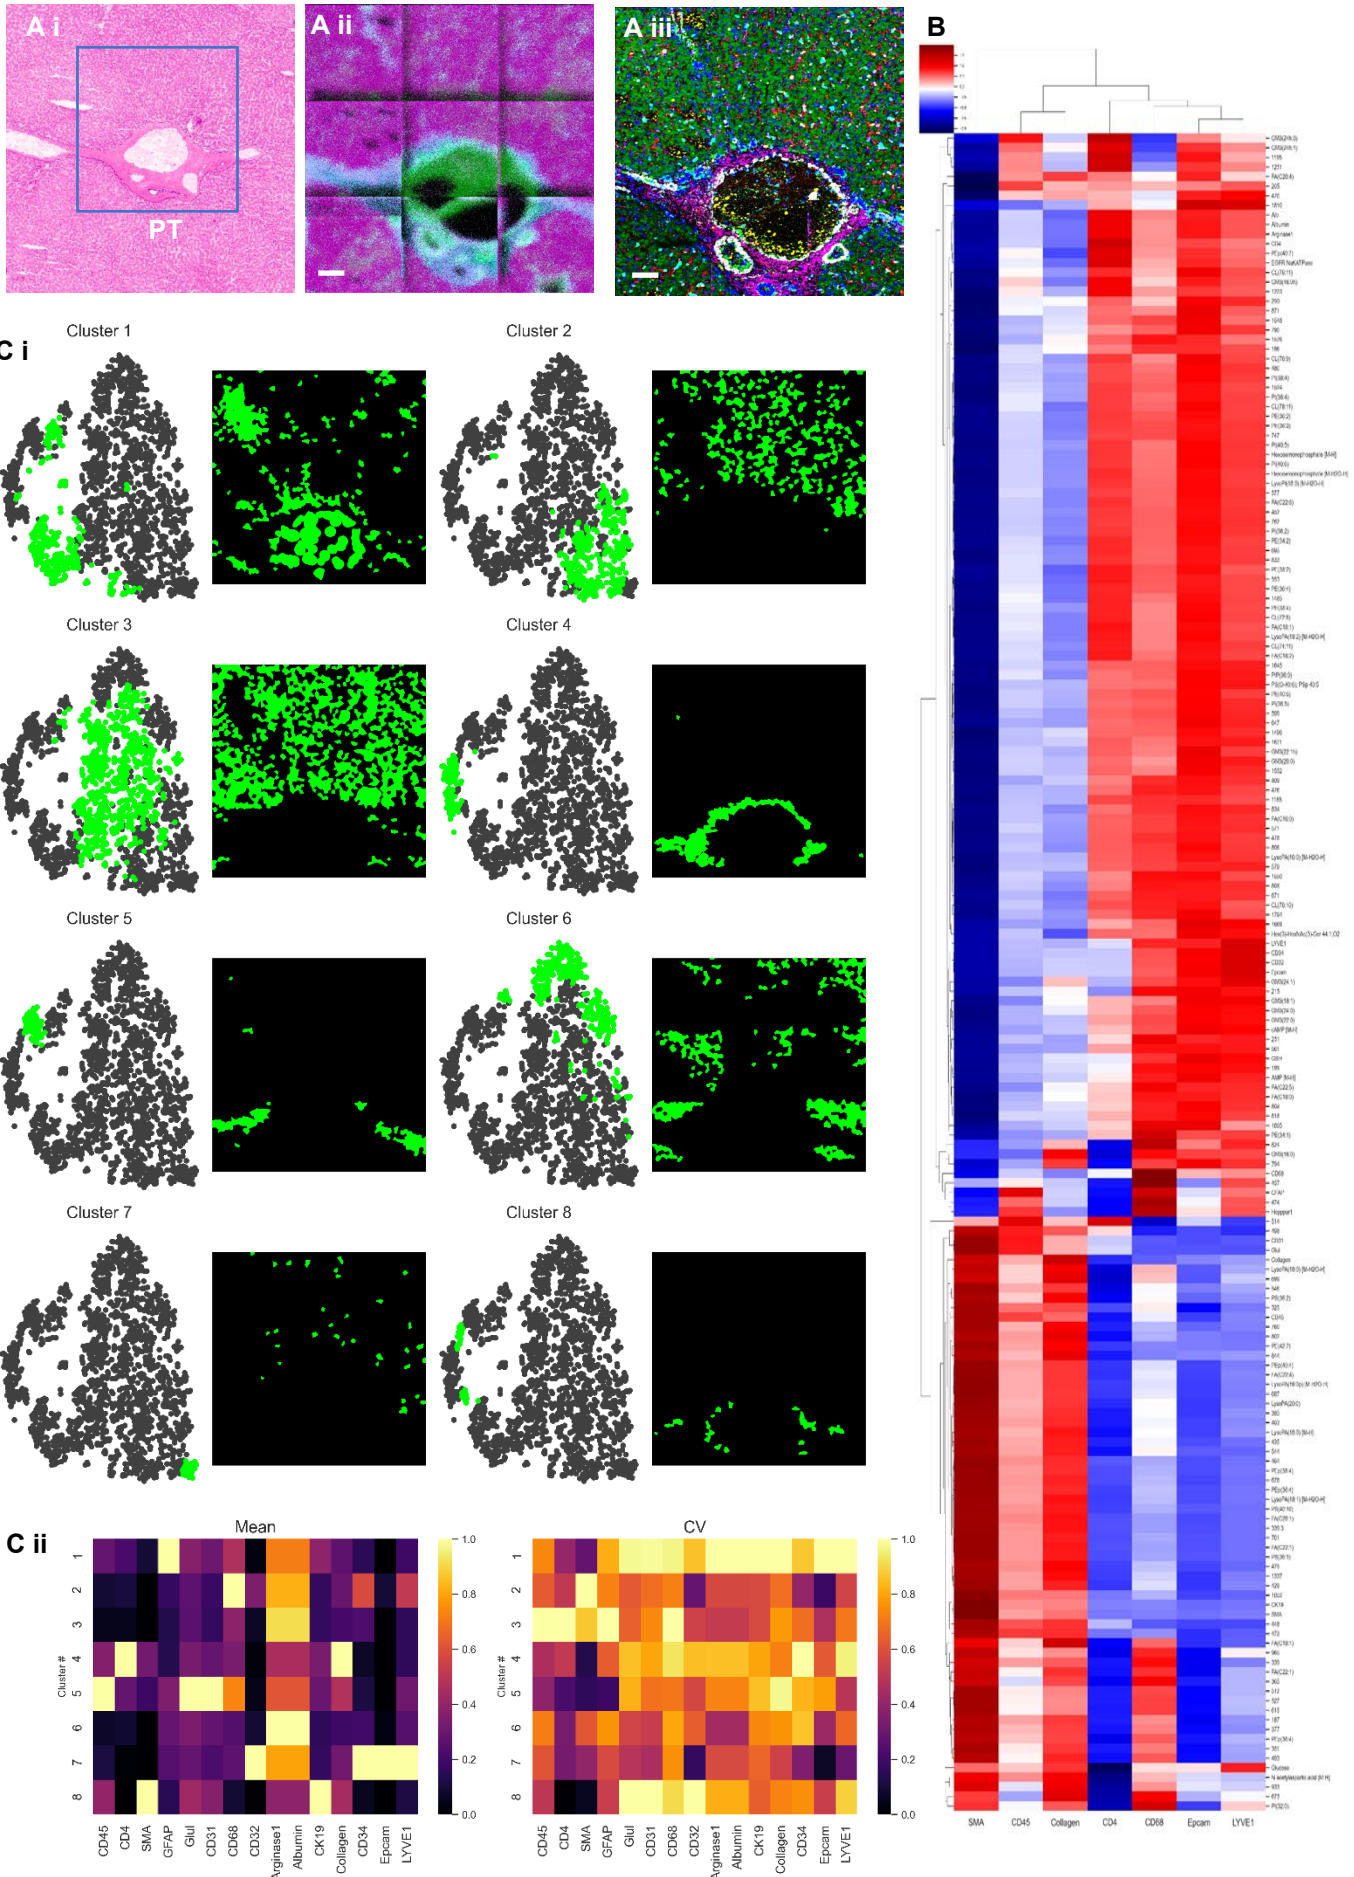



**Figure 4. Dual high-resolution SIMS imaging delineates the metabolomic and lipidomic states in different cell types on the human liver tissue section.** **Ai**, H&E image. The selected region contains the central vein and portal vein. **Aii**, Representative color overlay images of Dual-SIMS. Metabolites and lipids image in the same region as in Ai on a serial frozen-hydrated section using  $(\text{H}_2\text{O})_{n(n=30k)}$ -GCIB-SIMS at the spatial resolution of 3  $\mu\text{m}$ , Blue, PS 36:1; Magenta, PI 38:4; Green, HEME B. More single specie images are in Figure S10. Proteins image by lanthanides-conjugated antibodies from the same region after  $(\text{H}_2\text{O})_{n(n=30k)}$ -GCIB-SIMS using  $\text{C}_{60}$ -SIMS at spatial resolution of 1  $\mu\text{m}$ , Red, CD45 and CD11b; Magenta, GFAP; White, LYVE-1; Yellow, Heppar-1; Cyan, EGFR and Na/KATPase; Green, Glul; Blue, Nuclei. **Aiii**, The image alignment and registration of dual-SIMS images (i.e., Aii and Aiii). More details are described in supplementary Figures S16 and S17. **B**, HCA map shows the variation of different metabolites/lipids in different types of cells. **Ci**, tSNE clustering to classify the cell types as in cluster 1-8 by lipids and metabolites only. **Cii**, Correlation of cluster 1-8 to 15 protein markers.

**Table 1. Validation of lipid ion species from SIMS and DESI-MSI with MALDI-MSI and LC-MS/MS**

| Pericentral vein region                                      |           |                           |                      |                     | Periportal vein region                                       |                  |                           |                      |                     |
|--------------------------------------------------------------|-----------|---------------------------|----------------------|---------------------|--------------------------------------------------------------|------------------|---------------------------|----------------------|---------------------|
| (H <sub>2</sub> O) <sub>n</sub> -GCIB-SIMS negative ion mode |           | MALDI Orbitrap validation | LC-MS precursor mass | LC-MS/MS validation | (H <sub>2</sub> O) <sub>n</sub> -GCIB-SIMS negative ion mode |                  | MALDI Orbitrap validation | LC-MS precursor mass | LC-MS/MS validation |
| 303.23                                                       | FA C20:4  | NA                        | NA                   | NA                  | 255.23                                                       | FA C16:0         | NA                        | NA                   | NA                  |
| 311.23                                                       | FA C20:0  | NA                        | NA                   | NA                  | 279.23                                                       | FA C18:2         | NA                        | NA                   | NA                  |
| 742.53                                                       | PE 36:2   | PE(18:0/18:2)             | NA                   | NA                  | 283.26                                                       | FA C18:0         | NA                        | NA                   | NA                  |
| 766.54                                                       | PE 38:4   | PE(18:0/20:4)             | NA                   | NA                  | 514.28                                                       | Taurocholic acid | NA                        | NA                   | NA                  |
| 911.56                                                       | PI 40:5   | PI(18:0/22:5)             | NA                   | NA                  | 747.50                                                       | PA 40:6          | PA(18:0/22:6)             | 747.48               | PA 40:6             |
| 913.58                                                       | PI 40:4   | PI 40:4                   | NA                   | NA                  | 834.53                                                       | PS 40:6          | PS(18:0/22:6)             | 834.53               | PS 40:6             |
| 857.51                                                       | PI 36:4   | PI(16:0/20:4)             | NA                   | NA                  | 835.53                                                       | PI 34:1          | PI(12:0/22:1((11Z)))      | 835.53               | PI 34:1             |
| 723.50                                                       | PA 38:4   | PA(18:0/20:4)             | 723.48               | PA 18:2/20:2        | 1454.03                                                      | CL 72:5          | NA                        | NA                   | NA                  |
| 810.53                                                       | PS 38:4   | PS(18:0/20:4)             | 810.54               | PS 38:4             | 1455.95                                                      | CL 72:4          | NA                        | NA                   | NA                  |
| 812.54                                                       | PS 38:3   | NA                        | 812.55               | PS 38:3             | 1480.94                                                      | CL 74:6          | NA                        | NA                   | NA                  |
| 885.55                                                       | PI 38:4   | PI(18:0/20:4)             | 885.55               | PI 38:4             | 1482.08                                                      | CL 74:5          | NA                        | NA                   | NA                  |
|                                                              |           |                           |                      |                     | 1483.94                                                      | CL 74:4          | NA                        | NA                   | NA                  |
|                                                              |           |                           |                      |                     | 1484.98                                                      | CL 74:4          | NA                        |                      |                     |
| DESI negative ion mode                                       |           | MALDI Orbitrap validation | LC-MS precursor mass | LC-MS/MS validation | DESI negative ion mode                                       |                  | MALDI Orbitrap validation | LC-MS precursor mass | LC-MS/MS validation |
| 281.24                                                       | FA 18:1   | NA                        | NA                   | NA                  | 124.01                                                       | Taurine          | NA                        | NA                   | NA                  |
| 295.23                                                       | FA 18:2;O | NA                        | NA                   | NA                  | 306.08                                                       | GSH              | NA                        | NA                   | NA                  |
| 293.21                                                       | FA 18:3;O | NA                        | NA                   | NA                  | 762.51                                                       | PE 38:6          | NA                        | 762.50               | PE 38:6             |
| 309.28                                                       | FA 20:1   | NA                        | NA                   | NA                  | 346.05                                                       | AMP/dGMP         | NA                        | NA                   | NA                  |
| 311.3                                                        | FA 20:0   | NA                        | NA                   | NA                  | 175.03                                                       | Ascorbic acid    | NA                        | NA                   | NA                  |
| 307.26                                                       | FA 20:2   | NA                        | NA                   | NA                  | 514.28                                                       | ST 24:1;O5;T     | NA                        | NA                   | NA                  |
|                                                              |           |                           |                      |                     | 512.27                                                       | Sulfolipid       | NA                        | NA                   | NA                  |
|                                                              |           |                           |                      |                     | 498.29                                                       | ST 24:1;O4;T     | NA                        | NA                   | NA                  |
|                                                              |           |                           |                      |                     | 790.53                                                       | PE 40:6          | PE(18:0/22:6)             | 790.53               | PE 40:6             |
| DESI positive ion mode                                       |           | MALDI Orbitrap validation | LC-MS precursor mass | LC-MS/MS validation | DESI positive ion mode                                       |                  | MALDI Orbitrap validation | LC-MS precursor mass | LC-MS/MS validation |
| 647.46                                                       | DG 37:7   | NA                        | 647.45               | DG 37:7             | 818.50                                                       | PC 36:5          | PC 36:5                   | NA                   | NA                  |
| 840.55                                                       | PC 39:7   | NA                        | 840.55               | PC 39:7             | 756.54                                                       | PC 32:0          | PC 34:3                   | 756.54               | PC 32:0             |
| 848.54                                                       | PC 38:4   | PC 38:4                   | 848.55               | PC 38:4             | 560.31                                                       | LPC 18:1         | NA                        | NA                   | NA                  |
| 633.48                                                       | DG 34:1   | NA                        | 633.48               | DG 34:1             | 562.32                                                       | LPC 18:0         | PC 18:0                   | NA                   | NA                  |
| 631.46                                                       | DG 34:2   | NA                        | 631.46               | DG 34:2             | 518.32                                                       | LPC 16:0         | PC 16:0                   | NA                   | NA                  |
| 659.49                                                       | DG 36:2   | NA                        | 659.49               | DG 36:2             | 760.58                                                       | PC 34:1          | PC 34:1                   | NA                   | NA                  |
| 657.48                                                       | DG 36:3   | NA                        | 657.48               | DG 36:3             | 806.56                                                       | PC 38:6          | PC 36:3                   | NA                   | NA                  |
| 655.46                                                       | DG 36:4   | NA                        | 655.46               | DG 36:4             | 542.32                                                       | LPC 18:2         | NA                        | NA                   | NA                  |
| 856.56                                                       | PC P-40:6 | NA                        | 856.55               | PC P-40:6           | 786.59                                                       | PC 36:2          | PE(36:2)                  | 786.59               | PC 36:2             |
